# Supplementary material
Source: ML conference proceedings conference paper supplement (https://openreview.net/forum?id=JHlBLb6Jpz)
Supplement: supplementary_material [file Full_Paper_DRAG_With_Appendix.pdf › DRAG/Full_Paper_DRAG_With_Appendix.pdf]

---

# Decreasing Entropic Regularization Averaged Gradient for Semi-Discrete Optimal Transport

---

Anonymous Author(s)

Affiliation

Address

email

## Abstract

1 Adding entropic regularization to Optimal Transport (OT) problems has become  
2 a standard approach for designing efficient and scalable solvers. However, regu-  
3 larization introduces a bias from the true solution. To mitigate this bias while still  
4 benefiting from the acceleration provided by regularization, a natural solver would  
5 adaptively decrease the regularization as it approaches the solution. Although some  
6 algorithms heuristically implement this idea, their theoretical guarantees and the  
7 extent of their acceleration compared to using a fixed regularization remain largely  
8 open. In the setting of semi-discrete OT, where the source measure is continuous  
9 and the target is discrete, we prove that decreasing the regularization can indeed  
10 accelerate convergence. To this end, we introduce DRAG: Decreasing (entropic)  
11 Regularization Averaged Gradient, a stochastic gradient descent algorithm where  
12 the regularization decreases with the number of optimization steps. We provide a  
13 theoretical analysis showing that DRAG benefits from decreasing regularization  
14 compared to a fixed scheme, achieving an unbiased  $\mathcal{O}(1/t)$  sample and iteration  
15 complexity for both the OT cost and the potential estimation, and a  $\mathcal{O}(1/\sqrt{t})$  rate  
16 for the OT map. Our theoretical findings are supported by numerical experiments  
17 that validate the effectiveness of DRAG and highlight its practical advantages.

## 18 1 Introduction

19 Optimal transport is now a widely used framework to compare probability distributions in different  
20 areas of data science such as machine learning [14, 25, 6], computational biology [47], imaging  
21 [21, 7], even economics [22] or material sciences [9]. The computational and statistical efficiency of  
22 OT solvers is the key to facilitating their use in practical applications. Therefore, both computational  
23 methods and the statistical bottleneck in OT, often referred to as the curse of dimensionality, have  
24 received significant attention over the past decade [42, 57]. Regularization such as Entropic OT (EOT)  
25 [16] is a popular method to mitigate these two issues. It consists of adding an entropic regularization  
26 term to the objective function. OT and its entropic regularization apply to different contexts of interest.  
27 The most general context is when the two distributions are accessed via samples and one wants to  
28 estimate the OT distance and the corresponding plan or map. Another context of interest in some  
29 applications, that has recently gained popularity in generative modeling [2, 10, 36], is the case of  
30 semi-discrete OT. In this setting, one of the two distributions is discrete and the other continuous.  
31 The OT problem, while being a natural proxy to the continuous case, is then slightly simpler since (i)  
32 it reduces to the estimation of Laguerre cells and (ii) the curse of dimensionality is alleviated [45].

33 **Related works.** The incorporation of entropic regularization for OT was pioneered in the discrete  
34 setting by Cuturi [16], showing that the Sinkhorn algorithm [53] can efficiently solve the EOT problem.  
35 Sinkhorn leads to an  $\varepsilon$ -accurate OT plan in  $\mathcal{O}(n^2/\varepsilon^2)$  time when both measures have  $n$  points [19].  
36 However, the poor dependence on  $\varepsilon$ , observed both theoretically and empirically, motivated annealing

strategies (also called  $\varepsilon$ -scaling), which gradually decrease the regularization during optimization to better approximate the true OT solution. Such schemes appear to significantly improve performance in practice [34, 48, 20], but their theoretical analysis remains largely open [52, 48, 12]. From a statistical perspective, it has recently been shown that decreasing the regularization is not only computationally beneficial but also statistically necessary: [45] demonstrate in the semi-discrete setting that with  $t$  samples from the source and target measures, taking  $\varepsilon \asymp 1/\sqrt{t}$  allows one to achieve a minimax-optimal  $\mathcal{O}(1/\sqrt{t})$  rate for OT map estimation, thereby escaping the curse of dimensionality without assuming smoothness of the transport map. Their analysis leverages convergence results for entropic potentials [1, 18] and builds upon the entropic map estimator developed in [51, 44].

In parallel, there has been increasing interest in solving semi-discrete OT problems, where the source distribution is continuous while the target measure is known and discrete [2, 54]. In low dimensions, when the source density is fully known, Newton-type solvers [38, 35, 31] have been proposed, offering highly efficient methods for solving the semi-dual problem. In higher dimensions, or when the source measure is only accessible via samples [24] propose solving the semi-dual formulation of semi-discrete (E)OT using an SGD scheme. SGD solvers are a natural choice here since they are well-suited for large-scale applications: they can operate in an online setting using one sample at a time without storage requirements, and they avoid discretization bias. The study of SGD and Averaged SGD (ASGD) for solving the semi-dual of EOT was further investigated in [5], revealing, however, prohibitive constants in terms of  $1/\varepsilon$  and higher. This study shows that, as in the discrete case, the use of entropic regularization introduces a computational trade-off.

**Contributions.** We introduce DRAG (Decreasing Regularization Averaged Gradient), an SGD-based algorithm for solving the non-regularized semi-discrete OT. DRAG employs a decreasing entropic regularization scheme decaying with the sample count, aiming to have the best regularization/accuracy trade-off at any time. While matching the computational and memory efficiency of vanilla SGD, DRAG attains superior convergence compared to fixed-regularization methods by exploiting the enhanced properties of the entropic semi-dual without incurring adverse dependencies on the vanishing regularization. Concretely, given  $t$  iid samples from the source measure, DRAG achieves rates up to  $\mathcal{O}(1/t)$  for both the OT cost and the potential. A key technical result (Lemma 2) underlying DRAG is that, within an  $\varepsilon$ -ball around the optimum, the entropic semi-dual with regularization  $\varepsilon$  satisfies a restricted strong-convexity property independent of  $\varepsilon$ . DRAG is designed to remain, with high probability, within this  $\varepsilon$ -ball, even as  $\varepsilon$  decreases. Furthermore, by analyzing the difference between the Laguerre cells induced by the true OT potential and our estimate, we establish a  $\mathcal{O}(1/\sqrt{t})$  convergence rate for the OT map. Both our theoretical analysis and numerical experiments confirm the benefits of decreasing regularization incorporated in DRAG.

**Notations.** We note  $\|\cdot\|$  the Euclidean norm, and for  $\mathcal{C} \subset \mathbb{R}^d$ ,  $D_{\mathcal{C}} := \sup\{\|x - y\| : x, y \in \mathcal{C}\}$  denote its diameter. For  $a, b \in \mathbb{R}$ ,  $a \vee b := \max\{a, b\}$  and  $a \wedge b := \min\{a, b\}$ . For  $v \in \mathbb{R}^d$ ,  $v_{\min} := \min_{1 \leq j \leq d} v_j$ .  $\mathbf{1}_d$  and  $\mathbf{0}_d$  denote the vectors  $(1, \dots, 1)$  and  $(0, \dots, 0)$  in  $\mathbb{R}^d$ .  $\lambda_{\mathbb{R}^d}$  is the Lebesgue measure in  $\mathbb{R}^d$ .  $\mathcal{P}(\mathbb{R}^d)$  is the set of probabilities in  $\mathbb{R}^d$ , and for  $\rho \in \mathcal{P}(\mathbb{R}^d)$ ,  $\text{Supp}(\rho)$  is its support.  $\mathcal{O}(\cdot)$  and  $o(\cdot)$  are the usual approximation orders. We use  $f \lesssim g$  if there exists a constant  $C > 0$  such that  $f(\cdot) \leq Cg(\cdot)$ . We write  $a \asymp b$  if both  $a \lesssim b$  and  $b \lesssim a$ .

## 2 Behind Stochastic Approximation for Optimal Transport

### 2.1 Background on (Entropic) Optimal Transport

Given a source and target probability measures  $\mu, \nu \in \mathcal{P}(\mathbb{R}^d)$ , a cost function  $c : \mathbb{R}^d \times \mathbb{R}^d \rightarrow \mathbb{R}^+$  and a regularization parameter  $\varepsilon \geq 0$ , the Entropic Optimal Transport (EOT) problem is

$$\text{OT}_c^\varepsilon(\mu, \nu) := \min_{\pi \in \Pi(\mu, \nu)} \int_{\mathbb{R}^d \times \mathbb{R}^d} c(x, y) d\pi(x, y) + \varepsilon \int_{\mathbb{R}^d \times \mathbb{R}^d} \ln \left( \frac{d\pi}{d\mu d\nu}(x, y) \right) d\pi(x, y), \quad (1)$$

where  $\Pi(\mu, \nu)$  is the set of joints probability measures on  $\mathbb{R}^d \times \mathbb{R}^d$  with marginals  $\mu$  and  $\nu$ . Mild conditions on  $\mu, \nu$  and the cost can be made so that this problem is well-posed, see [56]. When  $\varepsilon = 0$ , Problem (1) recovers the Kantorovich formulation of OT. In this article, we focus on the quadratic cost  $c(x, y) = \frac{1}{2}\|x - y\|^2$ , although some of our results can be extended to other costs. Our analysis

85 relies on the semi-dual formulation of the convex problem (1) given by

$$\text{OT}_c^\varepsilon(\mu, \nu) = \min_{f \in C(\mathbb{R}^d)} - \int_{\mathbb{R}^d} f(x) d\mu(x) - \int f^{c,\varepsilon}(y) d\nu(y), \quad (2)$$

86 where for all  $y \in \mathbb{R}^d$ ,

$$f^{c,\varepsilon}(y) := \begin{cases} \min_{x \in \mathbb{R}^d} c(x, y) - f(x) & \text{if } \varepsilon = 0, \\ -\varepsilon \log \left( \int_{\mathbb{R}^d} \exp \left( \frac{f(x) - c(x, y)}{\varepsilon} \right) d\mu(x) \right) & \text{if } \varepsilon > 0. \end{cases}$$

87 Under mild conditions on the cost or densities, a positive  $\varepsilon$  makes the semi-dual formulation  $1/\varepsilon$ -  
88 smooth [17]. The key property of this semi-dual formulation of (E)OT is to retain more convexity  
89 than the standard dual of (1) (see [28, 55]).

90 **Optimal map and Brenier's theorem.** We consider the quadratic cost,  $\varepsilon = 0$  and  $\mu, \nu$  having  
91 second-order moments. Under the additional assumption that the measure  $\mu$  is absolutely continuous,  
92 the optimal potential  $f^*$ , called Kantorovich potential, is (locally) Lipschitz and the map

$$T_{\mu, \nu}(x) := x - \nabla f^*(x) \quad (3)$$

93 pushes forward  $\mu$  onto  $\nu$  (see [8]). In addition,  $T_{\mu, \nu}$  is the gradient of a convex function. This optimal  
94 map has more importance than the OT cost in subfields of machine learning such as generative  
95 modeling [29, 36] or domain adaptation [15].

## 96 2.2 Semi-discrete OT

97 Semi-discrete (E)OT is when the source measure  $\mu$  is absolutely continuous and the target measure  
98  $\nu = \sum_{j=1}^M w_j \delta_{y_j}$  is a finite sum of  $M \geq 1$  Dirac masses with weights  $w_j > 0$ . In this case, the  
99 semi-dual formulation reduces to a finite-dimensional convex optimization problem on  $\mathbb{R}^M$

$$\min_{\mathbf{g} \in \mathbb{R}^M} H_\varepsilon(\mathbf{g}) \stackrel{\text{def.}}{=} - \int_{\mathbb{R}^d} \mathbf{g}^{c,\varepsilon}(x) d\mu(x) - \sum_{j=1}^M g_j w_j, \quad (4)$$

100 where for all  $x \in \mathbb{R}^d$ ,  $\mathbf{g}^{c,\varepsilon}(x)$  is a (vectorial)  $(c, \varepsilon)$ -transform with respect to a vector  $\mathbf{g} =$   
101  $(g_1, \dots, g_M) \in \mathbb{R}^M$ , defined by

$$\mathbf{g}^{c,\varepsilon}(x) = \begin{cases} \min_{j \in \llbracket 1, M \rrbracket} \left[ \frac{1}{2} \|x - y_j\|^2 - g_j \right] & \text{if } \varepsilon = 0, \\ -\varepsilon \ln \left( \sum_{j=1}^M \exp \left( \frac{-\frac{1}{2} \|x - y_j\|^2 + g_j}{\varepsilon} \right) w_j \right) & \text{if } \varepsilon > 0. \end{cases}$$

102 The vector  $\mathbf{g}$  corresponds to the value of the potential function at the points  $y_j$ . For notational  
103 convenience, we write  $H_\varepsilon(\mathbf{g}) = \int_{\mathbb{R}^d} h_\varepsilon(x, \mathbf{g}) d\mu(x)$  with  $h_\varepsilon(x, \mathbf{g}) = -\mathbf{g}^{c,\varepsilon}(x) - \sum_{j=1}^M g_j w_j$ . For  
104 all  $\mathbf{g} \in \mathbb{R}^M$  and given  $X \sim \mu$ , an unbiased estimator of the gradient is given by

$$\nabla_{\mathbf{g}} h_\varepsilon(X, \mathbf{g})_j = -w_j + \chi_j^\varepsilon(X, \mathbf{g}), \quad 1 \leq j \leq M,$$

105 where for  $(x, \mathbf{g}) \in \mathbb{R}^d \times \mathbb{R}^M$ , we have

$$\chi_j^\varepsilon(x, \mathbf{g}) = \frac{\exp \left( \frac{-\frac{1}{2} \|x - y_j\|^2 + g_j}{\varepsilon} \right) w_j}{\sum_{k=1}^M \exp \left( \frac{-\frac{1}{2} \|x - y_k\|^2 + g_k}{\varepsilon} \right) w_k}.$$

106 For  $\varepsilon = 0$ ,  $\chi_j(x, \mathbf{g}) = \mathbb{1}_{\mathbb{L}_j(\mathbf{g})}(x)$  is an indicator function and we have a partition  $\mathbb{R}^d = \bigcup_{j=1}^M \mathbb{L}_j(\mathbf{g})$ ,  
107 where for all  $j \in \llbracket 1, M \rrbracket$ ,

$$\mathbb{L}_j(\mathbf{g}) := \left\{ x \in \mathbb{R}^d; \mathbf{g}^c(x) = \frac{1}{2} \|x - y_j\|^2 - g_j \right\}.$$

108 The convex sets  $\mathbb{L}_j(\mathbf{g})$  are called power or Laguerre cells and  $\mu(\mathbb{L}_i(\mathbf{g}) \cap \mathbb{L}_j(\mathbf{g})) = 0$  when  $i \neq j$ . By  
109 the first-order optimality condition, solving semi-discrete OT amounts to finding  $\mathbf{g}$  such that for all  
110  $j \in \llbracket 1, M \rrbracket$ ,  $\mu(\mathbb{L}_j(\mathbf{g})) = w_j$ . Semi-discrete OT is a case of application of Brenier's theorem. Given  
111 the optimal potential  $\mathbf{g}^*$ , the OT map is  $T_{\mu, \nu}(x) = x - \nabla(\mathbf{g}^*)^c(x) = x - y_j$  for  $x$  inside  $\mathbb{L}_j(\mathbf{g}^*)$ .

## 2.3 Solving semi-discrete (E)OT with the semi-dual formulation

Exploiting its finite-dimensional nature, solving semi-discrete OT by optimizing its semi-dual formulation has become a popular approach. Notably, Newton methods are highly effective to solve  $H_0$  in scenarios with low dimensions and known source densities, utilizing meshes to approximate the source density [38, 35, 31]. In scenarios involving arbitrary dimensions or when only sample-based access to the source measure is available, EOT emerges as a favored strategy. Notably, to avoid working with a discretized version of the source measure, such as with the Sinkhorn Algorithm, [24] recommend employing stochastic optimization to solve (4). Indeed, the semi-dual EOT problem has a convex objective of the form

$$H_\varepsilon(\mathbf{g}) = \mathbb{E}_{X \sim \mu}[h_\varepsilon(X, \mathbf{g})],$$

with  $X$  as a random variable under  $\mu$ . As noted in [24], the main advantage of stochastic optimization algorithms is that they are suited for really large-scale problems, keeping in memory only the discrete measure  $\nu$ . Moreover, avoiding discretization enables unbiased estimation of (E)OT quantities. SGD-based solvers also naturally operate in an online fashion, progressively refining their solutions as more samples become available.

For a given fixed regularization parameter  $\varepsilon > 0$ , stochastic first-order methods are predominantly employed to solve (4). Starting with an initial value  $\mathbf{g}_0 \in \mathbb{R}^M$ , these algorithms consider at each iteration one or many samples  $X_t \sim \mu$  and rely on an update of the form

$$\mathbf{g}_t = \mathbf{g}_{t-1} - \gamma_t \nabla_{\mathbf{g}} h_\varepsilon(X_t, \mathbf{g}_{t-1}).$$

At time  $t$ , the Averaged Stochastic Gradient Descent (ASGD) returns the averaged estimate  $\bar{\mathbf{g}}_t = \frac{1}{t+1} \sum_{k=0}^t \mathbf{g}_k$ , while Stochastic Gradient Descent (SGD) returns  $\mathbf{g}_t$ . ASGD, as an acceleration of SGD, has been widely studied in the literature (see [43, 41, 4], and [5] for the specific case of EOT).

**Choosing the regularization parameter  $\varepsilon$  for EOT.** Approximating the EOT problem rather than the OT one benefits from an enhanced convergence rate, especially in the discrete setting. The introduction of the Sinkhorn Algorithm for solving the EOT problem, as highlighted by [16], has led to a resurgence of interest in OT within the Machine Learning community.

The choice of the regularization parameter  $\varepsilon$  then becomes a practical and/or statistical problem:

1. Selecting the regularization parameter is a practical issue that aims to strike an optimal balance between convergence speed and accuracy [16, 19]. To address this trade-off, some heuristics, such as  $\varepsilon$ -scaling [49], which involves a decreasing regularization scheme, are employed in the discrete setting, although they lack sharp theoretical guarantees.
2. In the semi-discrete and continuous settings, the initial statistical problem is to determine the number of samples needed to accurately approximate the OT quantities. In this line of work, the use of EOT to construct estimators has also been proven to be satisfactory. In this case, studies show that regularization must decrease as the number of samples increases [44, 45]. However, discrete solvers do not adjust to the number of drawn points, as the solver is initiated once the points to approximate the measures have been sampled.

## 3 DRAG: Decreasing Regularization Averaged Gradient

### 3.1 The setting.

We focus here on the one-sample setting of semi-discrete OT. Specifically, we sample from the source measure  $\mu$  and leverage the full information of the discrete measure  $\nu$ . Furthermore, fixing  $R > 0$  and  $\alpha \in (0, 1]$ , we make the following mild assumption, already present in [18, 45].

**Assumption 1.** We assume that  $\mu \in \mathcal{P}(\mathbb{R}^d)$  has support contained in the convex ball  $B(0, R)$  and admits a density  $d\mu$  that is  $\alpha$ -Hölder continuous and satisfies  $0 < d\mu < \infty$  on its support. We denote by  $\mathcal{P}_\alpha(B(0, R))$  the set of such measures.

The target  $\nu$  is assumed to be discrete, of the form  $\nu = \frac{1}{M} \sum_{j=1}^M \delta_{y_j}$ , with  $(y_1, \dots, y_M) \in B(0, R)^M$ .

### 3.2 DRAG: A gradient-based algorithm adaptive to both the sample size and the regularization parameter

To accurately estimate the non-regularized OT cost and map, it is crucial to use a regularization parameter  $\varepsilon$  that decreases as the number of drawn samples increases. However, no existing algorithm in the OT literature simultaneously adapts to both entropic regularization and sample size. Inspired by  $\varepsilon$ -annealing [49], a decreasing regularization scheme from the discrete OT setting, which is known for accelerating the convergence of the Sinkhorn algorithm in practice, and considering that SGD algorithms are inherently adaptive to the number of samples, we introduce the Decreasing entropic Regularization projected Averaged stochastic Gradient descent (DRAG) to solve the semi-dual (2). Our algorithm employs a decreasing regularization sequence  $(\varepsilon_t)_t$  and replaces the usual gradient step in SGD with a projected step using adaptive regularization

$$\mathbf{g}_t = \text{Proj}_{\mathcal{C}} (\mathbf{g}_{t-1} - \gamma_t \nabla_{\mathbf{g}} h_{\varepsilon_{t-1}}(X_t, \mathbf{g}_{t-1})),$$

where for  $U \subset \mathbb{R}^M$  convex, we define the projector as  $\text{Proj}_U(\mathbf{g}) := \arg \min\{\|\mathbf{g} - \mathbf{g}'\|, \mathbf{g}' \in U\}$ . This method can be interpreted as a decreasing bias SGD scheme. For such a method, employing a projection step can be highly effective in ensuring convergence [13, 23]. In the context of EOT with bounded cost, it is well established that the  $(c, \varepsilon)$ -transform enables the localization of a  $\|\cdot\|_{\infty}$ -ball, where a minimum of the semi-dual problem lies [40]. Specifically, since  $\sup\{c(x, y_j); x \in \text{Supp}(\mu), j \in [1, M]\} < 2R^2$  by Assumption 1, a preliminary projection set can be expressed as  $\mathcal{C}_{\infty} := [0, 2R^2]^M$  and we know that we can search for a minimum in this set. Nonetheless, leveraging the regularity of the cost function, we can have a projection set with a unique optimizer, as described in the following Lemma.

**Lemma 1.** (Proof in Appendix B.6) Under Assumption 1, for all  $\varepsilon \geq 0$ , there exists a unique solution  $\mathbf{g}_{\varepsilon}^*$  to (4) in  $\mathcal{C}_u := \{\mathbf{g} \in \mathbb{R}^M; g_1 = 0 \text{ and } |g_j| \leq R\|y_1 - y_j\|, j \in [1, M]\}$ .

Note that the choice  $g_1 = 0$  is arbitrary. In what follows, we refer to  $\mathcal{C} = \mathcal{C}_{\infty}$  or  $\mathcal{C} = \mathcal{C}_u$  as our projection set. Note that for both sets, the projection's computational complexity is only  $\mathcal{O}(M)$ , as it involves merely clipping each coordinate of our vector.

Finally, we consider the Decreasing Regularization projected Averaged stochastic Gradient descent (DRAG) defined by

$$\bar{\mathbf{g}}_t = \frac{1}{t+1} \mathbf{g}_t + \frac{t}{t+1} \bar{\mathbf{g}}_{t-1},$$

with  $\bar{\mathbf{g}}_0 = \mathbf{g}_0$ . The pseudo-code of our algorithm is given in Algorithm 1. A main advantage of DRAG is its  $\mathcal{O}(dtM)$  computational complexity and  $\mathcal{O}(dM)$  spatial complexity, which make it well suited for large-scale problems.

---

#### Algorithm 1 DRAG

---

**Parameters:**  $(\gamma_1, a, b, \mathcal{C})$

Initialize  $\mathbf{g}_0 \in \mathcal{C}$ ,  $\bar{\mathbf{g}}_0 = \mathbf{g}_0$ ,  $\varepsilon_0 = 1$ .

**for**  $k = 1$  to  $t$  **do**

$\gamma_k = \gamma_1 k^{-b}$

$X_k \sim \mu$

$\mathbf{g}_k = \text{Proj}_{\mathcal{C}} (\mathbf{g}_{k-1} - \gamma_k \nabla_{\mathbf{g}} h_{\varepsilon_{k-1}}(X_k, \mathbf{g}_{k-1}))$

$\bar{\mathbf{g}}_k = \frac{1}{k+1} \mathbf{g}_k + \frac{k}{k+1} \bar{\mathbf{g}}_{k-1}$

$\varepsilon_k = k^{-a}$

**end for**

**return**  $\bar{\mathbf{g}}_t$

---

### 3.3 Key properties of the semi-dual $H_{\varepsilon}$ for the design of DRAG

The design and convergence analysis of DRAG rely on two fundamental properties of the semi-dual objective  $H_{\varepsilon}$ . First, the fast convergence of entropic potentials ensures that the optimal solution does not change abruptly as the regularization parameter varies. Second, the enhanced Restricted Strong Convexity (RSC) of  $H_{\varepsilon}$  around its optimum. These two properties are crucial to the construction of DRAG and are detailed below.

**Convergence of the entropic potentials.** The following result from [18] establishes that the convergence of entropic optimal potentials is faster than linear as  $\varepsilon' \rightarrow \varepsilon$ .

**Proposition 1.** [Corollary 2.2 [18]] For  $0 \leq \varepsilon' \leq \varepsilon$ , under Assumption 1, there exists a constant  $K_0$ , notably depending on the characteristics of  $\nu$ , such that for any  $\alpha' \in (0, \alpha)$ ,

$$\|\mathbf{g}_{\varepsilon}^* - \mathbf{g}_{\varepsilon'}^*\| \leq K_0 \varepsilon^{\alpha'} (\varepsilon - \varepsilon').$$

Note that, up to a transformation of the form  $\mathbf{g}_{\varepsilon_t}^* + a\mathbf{1}_M$ , where  $a \in \mathbb{R}^*$ , the minimizer of the semi-dual is unique. Consequently, our analysis on the orthogonal complement of the subspace spanned by  $\mathbf{1}_M$ , denoted as  $\text{Vect}(\mathbf{1}_M)^\perp$ . For simplicity, for  $\mathbf{g}, \mathbf{g}' \in \mathbb{R}^M$ , we denote for  $p \in [1, \infty]$

$$\|\mathbf{g} - \mathbf{g}'\|_p := \|\mathbf{g} - \mathbf{g}'\|_{p, \text{Vect}(\mathbf{1}_M)^\perp}, \quad \langle \mathbf{g}, \mathbf{g}' \rangle := \langle \mathbf{g}, \mathbf{g}' \rangle_{\text{Vect}(\mathbf{1}_M)^\perp}.$$

**Global and local Restricted Strong Convexity.** The convergence behavior of gradient-based methods is a central topic in convex optimization. The Restricted Strong Convexity (RSC) condition [58] offers a strictly weaker alternative to strong convexity while still providing comparable guarantees in many settings [58, 50]. The following lemma characterizes the RSC of  $H_\varepsilon$ . Notably, while the global RSC constant on  $\mathcal{C}$  scales linearly with  $\varepsilon^{-1}$ , the local RSC in a neighborhood of radius  $\varepsilon/2$  around the optimum becomes independent of  $\varepsilon$ . This motivates the decreasing regularization scheme in DRAG: by gradually reducing  $\varepsilon$ , we ensure that iterates remain within regions where the improved convexity properties can be fully exploited.

**Lemma 2** (Global and local RSC of  $H_\varepsilon$ , proof in Appendix B.7). *For any  $\varepsilon \in (0, 1]$ , under Assumption 1, there exists  $\rho_*$  independent of  $\varepsilon$ , such that for all  $\mathbf{g} \in \mathcal{C}$ ,*

$$\langle \nabla H_\varepsilon(\mathbf{g}), \mathbf{g} - \mathbf{g}_\varepsilon^* \rangle \geq \begin{cases} \rho_* \frac{\varepsilon}{2c_\infty} \left(1 - e^{-\frac{2c_\infty}{\varepsilon}}\right) \|\mathbf{g} - \mathbf{g}_\varepsilon^*\|^2 & \text{if } \|\mathbf{g} - \mathbf{g}_\varepsilon^*\| > \frac{\varepsilon}{2}, \\ \rho_* (1 - e^{-1}) \|\mathbf{g} - \mathbf{g}_\varepsilon^*\|^2 & \text{if } \|\mathbf{g} - \mathbf{g}_\varepsilon^*\| \leq \frac{\varepsilon}{2}. \end{cases}$$

Here,  $\rho_*$  provides a lower bound on the strong convexity constant of  $H_\varepsilon$  restricted to the subspace  $\text{Vect}(\mathbf{1}^\perp)$ , and it holds uniformly over  $\varepsilon \in (0, 1]$  (see Theorem 3.2 in [18] for further details).

### 3.4 Convergence rate of DRAG

**Convergence rate before averaging.** The following proposition provides a key high-probability control, ensuring that the iterates  $\mathbf{g}_t$  remain uniformly close to the optimal potential  $\mathbf{g}_{\varepsilon_t}^*$  at all times  $t$ .

**Proposition 2.** (Proof in Appendix B.5) *Under Assumption 1 with  $\mu \in \mathcal{P}_\alpha(B(0, R))$ , taking the parameters  $(\gamma_1, a, b)$  of DRAG such that  $\gamma_1 > 0, b \in (\frac{1}{2}, 1)$ , with constraints  $2a < b, a + b < 1, 1 + a + a\alpha > 2b$ , we have for any  $\delta > 0$  and every  $q > 0$ ,*

$$\mathbb{P}(\|\mathbf{g}_t - \mathbf{g}_{\varepsilon_t}^*\| \geq \varepsilon_t) \lesssim t^{-q(b-2a)+\delta}.$$

This result is key to leveraging the locally enhanced RSC of  $H_{\varepsilon_t}$  and guides how quickly the regularization can decay. When  $b > 2a$ , it yields a convergence rate of  $o(t^p)$  for all  $p$ . This proposition leads to the convergence rate of the non-averaged DRAG iterates stated in Theorem 1.

**Dependence on  $a, b$ , and  $\alpha$ .** As we can see, the convergence rate depends on  $a, b$  from DRAG and the Hölder regularity. While the constraints may seem difficult to interpret, setting  $a$  arbitrarily close to  $\frac{1}{3}$  (denoted  $a = \frac{1}{3}^-$ ) and  $b = \frac{2}{3}$  ensures that the constraints are satisfied for any  $\alpha \in (1/2, 1]$ .

**Theorem 1.** (Proof in Appendix B.1) *Under the same assumptions as in Proposition 2, we have for any  $\alpha' \in (0, \alpha)$*

$$\mathbb{E}[\|\mathbf{g}_t - \mathbf{g}^*\|^2] \lesssim \frac{1}{\rho_* \cdot t^b} + \frac{1}{t^{2a+2a\alpha'}}, \quad t \geq 1.$$

Remarkably, we achieve a convergence rate without any undesirable dependence on regularization. In contrast, [5] derived a convergence rate of the form  $\mathcal{O}(\varepsilon^{-c}t^{-b})$  for a fixed regularization, with  $c$  at least equal to 1. Note that having no adverse dependence on the regularization parameter is a key necessary characteristic of DRAG, which aims to solve the non-regularized OT problem at fast rates.

**Enhanced convergence rate with averaging.** In convex stochastic optimization, it is known that averaging SGD iterations can lead to acceleration. More precisely, ASGD can adapt to the possibly unknown local strong convexity of the objective function at the optimizer [43, 3] and achieve optimal  $\mathcal{O}(1/t)$  converge rates. Despite the fact that our objective function changes at each time  $t$ , Theorem 2 shows that DRAG fully exploits the acceleration thanks to averaging.

**Theorem 2.** (Proof in Appendix B.2) *Under the same assumptions as in Theorem 1, noting  $s = \min\{1, 2a + 2a\alpha'\}$ , we have for all  $\alpha' \in (0, \alpha)$ ,*

$$\mathbb{E}[\|\bar{\mathbf{g}}_t - \mathbf{g}^*\|^2] \lesssim \frac{1}{t^s}.$$

The rates again depend on  $a$ ,  $b$ , and  $\alpha$ . The key message here is that by taking  $a = \frac{1}{3}^-$  and  $b = \frac{2}{3}$ , we recover the optimal  $\mathcal{O}(1/t)$  rate for any  $\alpha \in (\frac{1}{2}, 1]$ .

## 4 Optimal Transport cost and map estimation with DRAG

In the previous section, we established the convergence rate of DRAG to the OT potential. While this result was central to our theoretical analysis, our final objective is to estimate the OT cost and transport map. Leveraging the convergence rate of the potential, we derive estimation guarantees for these key OT quantities.

### 4.1 OT cost estimation

**Corollary 1.** (Proof in Appendix B.4) Taking the same assumptions as Theorem 2, with  $s = \min\{1, 2a + 2a\alpha'\}$ , we have

$$\mathbb{E} |H_0(\mathbf{g}^*) - H_0(\bar{\mathbf{g}}_t)| \lesssim \frac{1}{t^s}. \quad (5)$$

Once again, when  $\alpha > 1/2$  and setting  $a = \frac{1}{3}^-$  and  $b = \frac{2}{3}$ , we achieve an  $\mathcal{O}(1/t)$  convergence rate, which is optimal for strongly convex objectives. This rate is obtained by leveraging the locally enhanced RSC property and our adaptive decreasing regularization scheme. The fact that  $H_0$  is locally smooth, as noted in Theorem 4.1 of [32], also plays a crucial role in the proof of Corollary 2.

### 4.2 Brenier map estimation

When employing entropic regularization, a popular choice to approximate the OT map involves using the estimator of the entropic Brenier map [44]  $T_{\mu,\nu}^\varepsilon(\mathbf{g}^*)(x) = x - \nabla(\mathbf{g}_\varepsilon^*)^{c,\varepsilon}$ . Indeed, for  $\hat{\mathbf{g}} \in \mathbb{R}^M$ ,  $T_{\mu,\nu}^\varepsilon(\hat{\mathbf{g}})(x)$  could serve as an estimator. The objective is then to find an accurate estimator,  $\hat{\mathbf{g}}$ , close to  $\mathbf{g}_\varepsilon^*$ , and to analyze its performance based on the bias-variance decomposition

$$\|T_{\mu,\nu} - T_{\mu,\nu}^\varepsilon(\hat{\mathbf{g}})\|_{L^2(\mu)}^2 \lesssim \|T_{\mu,\nu}^\varepsilon(\hat{\mathbf{g}}) - T_{\mu,\nu}^\varepsilon(\mathbf{g}_\varepsilon^*)\|_{L^2(\mu)}^2 + \varepsilon,$$

using the fact that  $\|T_{\mu,\nu} - T_{\mu,\nu}^\varepsilon(\mathbf{g}_\varepsilon^*)\|_{L^2(\mu)}^2 \lesssim \varepsilon$  ([45], Theorem 3.4). However, the mapping  $\mathbf{g} \mapsto T_{\mu,\nu}^\varepsilon(\mathbf{g})$  is  $\varepsilon^{-1}$ -Lipschitz, complicating the bias-variance trade-off given that  $\varepsilon_t = t^{-a}$ . Instead, we rely on the gradient computed thanks to the  $c$ -transform of the estimator  $\bar{\mathbf{g}}_t$  of DRAG. In fact, for any  $x \in \mathbb{R}^d$ , if there exists  $j \in \llbracket 1, M \rrbracket$  such that  $x$  is in the interior of  $\mathbb{L}_j(\mathbf{g}^*) \cap \mathbb{L}_j(\bar{\mathbf{g}}_t)$ , we have  $T_{\mu,\nu}(x) = x - \nabla(\bar{\mathbf{g}}_t)^c(x)$ . Indeed, no matter  $\mathbf{g}$ , whenever  $x \in \mathbb{R}^d$  is in the interior of  $\mathbb{L}_j(\mathbf{g})$ , the gradient of  $\mathbf{g}^c$  is given by

$$\nabla(\mathbf{g})^c(x) = \arg \max_k \left[ \frac{1}{2} \|x - y_k\|^2 - g_j \right] = y_j. \quad (6)$$

By analyzing the differences of Laguerre cells partitions between  $\mathbb{L}(\bar{\mathbf{g}}_t)$  and  $\mathbb{L}(\mathbf{g}^*)$ , we derive the following theorem.

**Theorem 3.** (Proof in Appendix B.3) Under the same assumptions as Theorem 1, defining for all  $x \in \mathbb{R}^d$  and time  $t \geq 0$   $T(\bar{\mathbf{g}}_t)(x) = x - \nabla \bar{\mathbf{g}}_t^c$ ,  $s = \min\{1, 2a + 2a\alpha'\}$ , we have for all  $1 \leq p < \infty$

$$\mathbb{E} \left[ \|T_{\mu,\nu} - T_{\mu,\nu}(\bar{\mathbf{g}}_t)\|_{L^p(\mu)}^p \right] \lesssim \frac{1}{t^{s/2}}.$$

When  $\alpha > 1/2$ , setting  $a = \frac{1}{3}^-$  and  $b = \frac{2}{3}$ , we recover an  $\mathcal{O}(1/\sqrt{t})$  convergence rate. This matches the rate obtained in [45], but in our case it is achieved in the one-sample setting with an algorithm that refines its estimate online, whereas their approach relies on the Sinkhorn algorithm in a batched setting. Note that, unlike our method, theirs achieves the optimal rate for any  $\alpha \in (0, 1)$ . However, the use of online algorithms is crucial in high-dimensional applications where data is sampled sequentially, such as in generative modeling. In such settings, although the source measure is not compact, it is often chosen to be the standard Gaussian, which has a Lipschitz density and therefore corresponds to the case  $\alpha = 1$ .

## 277 5 Numerical experiments

278 **Convergence rates of DRAG on synthetic data.** We numerically verify here our convergence rate  
 279 guarantees through various examples. For each example, we know the theoretical OT map, cost, and  
 280 discrete potential. The first two examples are similar to those in [45]. In all figures and experiments,  
 281 we set the parameters of DRAG to  $\varepsilon_t = 0.1/t^a$ ,  $a = 0.33$ ,  $b = 2/3$ ,  $\gamma_1 = \text{Diam}(\text{Supp}(\mu))$ . Our  
 282 numerical investigation found that our parameter selection is robust without further hypertuning.

283 **Examples settings:** (1)  $\mu \sim \mathcal{U}([0, 1]^{10})$ ,  $\text{Supp}(\nu) = \{y_j = (\frac{j-1/2}{M}, \frac{1}{2}, \dots, \frac{1}{2}), j \in \llbracket 1, M \rrbracket\}$ ,  $\mathbf{w} =$   
 284  $\frac{1}{M} \mathbf{1}_M$ ,  $M = 1000$ . (2)  $\mu \sim \mathcal{U}([0, 1]^{10})$ ,  $M = 30$  and  $y_1, \dots, y_M$  randomly generated in  $[0, 1]^{10}$ . We  
 285 then also randomly generate  $\mathbf{g}^* \in \mathbb{R}^{30}$  and approximate  $\mathbf{w}$  with Monte Carlo (MC), such that  $\mathbf{g}^*$  is  
 286 the discrete optimum potential. This setting led to non-uniform weights, with  $w_{\min} = 0.0011$ . (3)  
 287  $\mu \sim \mathcal{U}([\delta, 1 + \delta])$ ,  $\delta = 0.5$ ,  $\text{Supp}(\nu) = \{\frac{k}{M}; k \in \llbracket 1, M \rrbracket\}$ ,  $\mathbf{w} = \frac{1}{M} \mathbf{1}_M$ ,  $M = 1000$ .

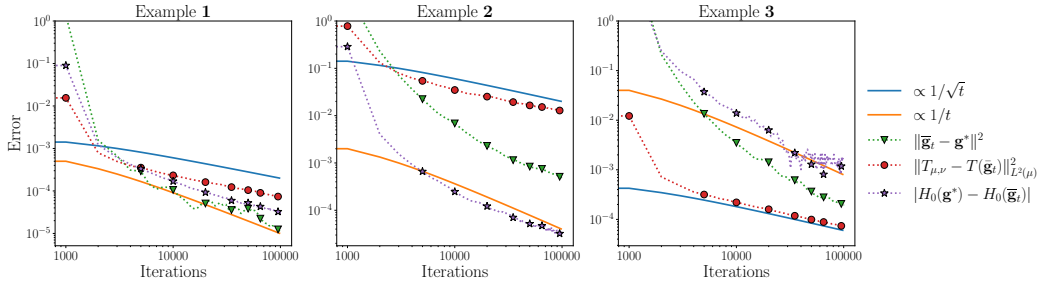

Figure 1: Convergence rate to the OT potential, cost and map for Examples 1, 2 and 3.

288 In Figure 1, we show the convergence rates of the OT cost, map, and discrete potential. As we  
 289 can see, our theoretical rates are matched for all OT quantities. The higher variance in the OT cost  
 290 estimations in Example 3 is likely due to the use of  $10^8$  Monte Carlo samples to approximate  $H$ ,  
 291 which introduces an additional approximation error beyond the one caused by DRAG alone.

292 **DRAG compared to fixed regularization ASGD.** In Figures 2 and 3, we compare the effectiveness  
 293 and robustness of decreasing vs. fixed regularization schemes. Figure 2 shows that DRAG consistently  
 294 outperforms projected ASGD with various fixed regularization values, achieving a better trade-off  
 295 between convergence speed and solution quality. Fixed schemes either converge to biased solutions  
 296 when regularization is large or fail to converge in time when it is too small (e.g.,  $\varepsilon = 5 \cdot 10^{-3}$ ).  
 297 This highlights DRAG's advantage during the entire optimization process and supports the idea that  
 298 starting with high regularization and gradually reducing it yields more stable and accurate solutions  
 299 in semi-discrete optimal transport. Figure 3 shows DRAG's robustness to the decay parameter  $a$ :  
 300 both  $a = 0.3$  and  $a = 0.5$  yield similar convergence, indicating low sensitivity. All decreasing  
 301 regularization variants also clearly outperform the non-regularized projected ASGD. While all  
 302 regularization schemes eventually converge with more iterations, DRAG remains one to two orders  
 303 of magnitude more accurate, due to its improved start visible in both figures (see Appendix A).

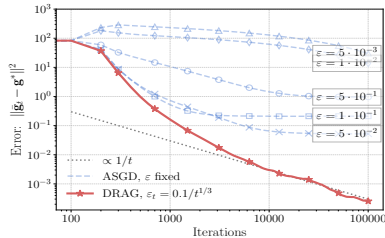

Figure 2: DRAG compared to ASGD with a fixed regularization on Example 1.

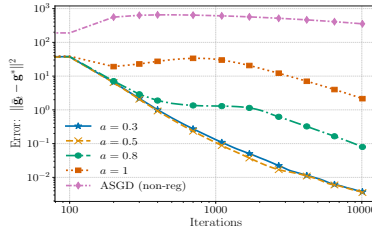

Figure 3: DRAG, with different decreasing regularization rate  $\varepsilon_t = 0.1/t^a$  on Example 1.



**Generative modeling task.** We illustrate the practical benefits of our solver in the context of generative modeling. In [2], semi-discrete OT is used to map a simple prior onto encoded data points in latent space, with the goal of reducing mode collapse. To generate new samples, they approximate a semi-discrete OT map from a standard gaussian to the empirical distribution of encoded data points in the latent space and then apply a specific interpolation scheme to obtain a continuous mapping from prior to latent space. We replicate their pipeline on toy datasets from their repository [27], replacing their ADAM-based solver with DRAG, using the same number of samples. As we can see, while both solvers yield good results on the "swissroll" target data, DRAG outperforms the ADAM solver on the "spiralarms" data, being able to almost completely generate it, whereas ADAM shows poorer coverage. Since the Gaussian is not compactly supported, this setup falls under Assumption 1, and DRAG was run without projections. This further underscores its robustness in more general settings.

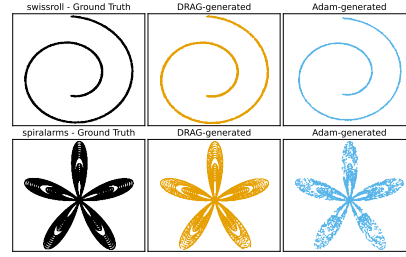

Figure 4: Comparison of DRAG and ADAM for a generative model task

**Monge-Kantorovich Quantiles.** We visualize our OT map estimator on a concrete example of Monge-Kantorovich (MK) quantiles [11]. In this context, having a target measure  $\nu$  to investigate, the source measure is set to be the uniform measure on the unit Euclidean ball  $\mu \sim \mathcal{U}(B(0, 1))$ . Given the OT map  $T_{\mu, \nu}$  (or its approximation),  $T_{\mu, \nu}(B(0, k/10))$  for  $k \in \llbracket 1, 10 \rrbracket$  define MK quantile regions. We used  $M = 10^5$  points to approximate  $\nu$ , a discrete version of a boomerang-shaped measure and benchmarked DRAG against two OT solvers that can solve semi-discrete OT: Online Sinkhorn [37], using the EOT map estimator and Neural OT [33]. DRAG and Online Sinkhorn used  $10^7$  source samples; for the latter, the entropic regularisation was tuned to  $\varepsilon = 10^{-3}$ . Both ran in under one minute. Neural OT, following Appendix B of [33], processed over  $10^8$  samples using a three hidden layers MLP, was ten times slower, even on a A100 GPU. Figure 5 displays the estimated MK quantile regions of the target measure  $\nu$ , color-coding each centered annulus region. As visible in the figure, DRAG is the only method producing an unbiased estimate of the MK quantiles, fully covering the support of  $\nu$  while keeping every MK region convex, as expected in theory.

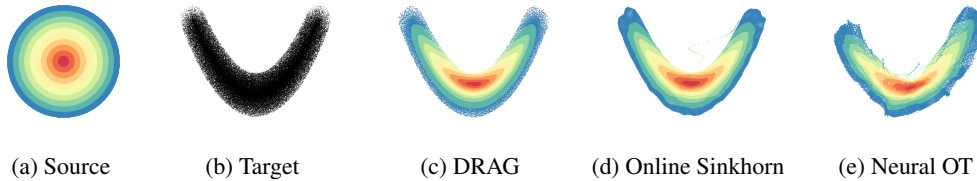

Figure 5: Comparison of Monge-Kantorovich quantiles approximation with different solvers

**Additional experiments.** The appendix presents further experiments that, while not affecting our theoretical results, may benefit practitioners. We show that mini-batching with GPU acceleration and weighted averaging of iterates  $\mathbf{g}_t$  can significantly speed up the algorithm. We also compare DRAG to Adam on synthetic data, highlighting its superior performance.

## 6 Conclusion

In EOT, a decreasing regularization parameter naturally appeals to practitioners who employ annealing schemes to accelerate Sinkhorn-like algorithms. Similarly, in the statistical community, regularization that decreases with the number of samples is preferred for more accurately approximating true OT quantities. With our algorithm, DRAG, we show that these two motivations for decreasing regularization can coexist successfully. We prove that DRAG achieves optimal convergence rates:  $\mathcal{O}(1/t)$  for both the OT potential and cost, and  $\mathcal{O}(1/\sqrt{t})$  for the OT map. These rates are obtained by leveraging decreasing regularization as a form of acceleration. To the best of our knowledge, this is the first algorithm in the OT literature that adapts to both regularization strength and sample size. Our results also motivate further investigation of decreasing regularization in (i) discrete OT, by adapting our approach to demonstrate the acceleration benefits of annealing schemes, and in (ii) semi-discrete OT, by developing new optimized versions of DRAG, such as those incorporating adaptive step sizes.

## References

- [1] J. M. Altschuler, J. Niles-Weed, and A. J. Stromme. Asymptotics for semidiscrete entropic optimal transport. *SIAM Journal on Mathematical Analysis*, 54(2):1718–1741, 2022.
- [2] D. An, Y. Guo, N. Lei, Z. Luo, S.-T. Yau, and X. Gu. Ae-ot: A new generative model based on extended semi-discrete optimal transport. *ICLR 2020*, 2019.
- [3] F. Bach. Adaptivity of averaged stochastic gradient descent to local strong convexity for logistic regression. *The Journal of Machine Learning Research*, 15(1):595–627, 2014.
- [4] F. Bach and E. Moulines. Non-strongly-convex smooth stochastic approximation with convergence rate  $\mathcal{O}(1/n)$ . *Advances in neural information processing systems*, 26, 2013.
- [5] B. Bercu and J. Bigot. Asymptotic distribution and convergence rates of stochastic algorithms for entropic optimal transportation between probability measures. *Annals of Statistics*, 49(2): 968–987, 2021.
- [6] J. Bigot, R. Gouet, T. Klein, and A. Lopez. Geodesic pca in the wasserstein space by convex pca. In *Annales de l’Institut Henri Poincaré (B) Probabilités et Statistiques*, volume 53, pages 1–26, 2017.
- [7] N. Bonneel and J. Digne. A survey of optimal transport for computer graphics and computer vision. *Computer Graphics Forum*, 42(2):439–460, 2023. doi: <https://doi.org/10.1111/cgf.14778>. URL <https://onlinelibrary.wiley.com/doi/abs/10.1111/cgf.14778>.
- [8] Y. Brenier. Polar factorization and monotone rearrangement of vector-valued functions. *Communications on Pure and Applied Mathematics*, 44(4):375–417, 1991.
- [9] M. Buze, J. Feydy, S. M. Roper, K. Sedighiani, and D. P. Bourne. Anisotropic power diagrams for polycrystal modelling: efficient generation of curved grains via optimal transport, 2024.
- [10] Y. Chen, M. Telgarsky, C. Zhang, B. Bailey, D. Hsu, and J. Peng. A gradual, semi-discrete approach to generative network training via explicit wasserstein minimization. In *International Conference on Machine Learning*, pages 1071–1080. PMLR, 2019.
- [11] V. Chernozhukov, A. Galichon, M. Hallin, and M. Henry. Monge–kantorovich depth, quantiles, ranks and signs. *The Annals of Statistics*, 45(1):223–256, 2017.
- [12] L. Chizat. Annealed sinkhorn for optimal transport: convergence, regularization path and debiasing. *arXiv preprint arXiv:2408.11620*, 2024.
- [13] K. Cohen, A. Nedić, and R. Srikant. On projected stochastic gradient descent algorithm with weighted averaging for least squares regression. *IEEE Transactions on Automatic Control*, 62(11):5974–5981, 2017.
- [14] N. Courty, R. Flamary, and D. Tuia. Domain adaptation with regularized optimal transport. In *Machine Learning and Knowledge Discovery in Databases: European Conference, ECML PKDD 2014, Nancy, France, September 15-19, 2014. Proceedings, Part I 14*, pages 274–289. Springer, 2014.
- [15] N. Courty, R. Flamary, D. Tuia, and A. Rakotomamonjy. Optimal transport for domain adaptation. *IEEE Transactions on Pattern Analysis and Machine Intelligence*, 39(9):1853–1865, 2017. doi: 10.1109/TPAMI.2016.2615921.
- [16] M. Cuturi. Sinkhorn distances: Lightspeed computation of optimal transport. *Advances In Neural Information Processing Systems*, 26, 2013.
- [17] M. Cuturi and G. Peyré. Semidual regularized optimal transport. *SIAM Review*, 60(4):941–965, 2018. doi: 10.1137/18M1208654. URL <https://doi.org/10.1137/18M1208654>.
- [18] A. Delalande. Nearly tight convergence bounds for semi-discrete entropic optimal transport. In *International Conference On Artificial Intelligence And Statistics*, pages 1619–1642, 2022.

- [19] P. Dvurechensky, A. Gasnikov, and A. Kroshnin. Computational optimal transport: Complexity by accelerated gradient descent is better than by sinkhorn’s algorithm. In *International Conference On Machine Learning*, pages 1367–1376, 2018.
- [20] J. Feydy. Geometric data analysis, beyond convolutions. *Applied Mathematics*, 2020.
- [21] J. Feydy, B. Charlier, F.-X. Vialard, and G. Peyré. Optimal transport for diffeomorphic registration. In M. Descoteaux, L. Maier-Hein, A. Franz, P. Jannin, D. L. Collins, and S. Duchesne, editors, *Medical Image Computing and Computer Assisted Intervention - MICCAI 2017*, pages 291–299, Cham, 2017. Springer International Publishing. ISBN 978-3-319-66182-7.
- [22] A. Galichon. *Optimal transport methods in economics*. Princeton University Press, 2018.
- [23] C. Geiersbach and G. C. Pflug. Projected stochastic gradients for convex constrained problems in hilbert spaces. *SIAM Journal on Optimization*, 29(3):2079–2099, 2019.
- [24] A. Genevay, M. Cuturi, G. Peyré, and F. Bach. Stochastic optimization for large-scale optimal transport. In *Advances In Neural Information Processing Systems*, volume 29, 2016.
- [25] A. Genevay, G. Peyré, and M. Cuturi. Learning generative models with sinkhorn divergences. In *International Conference on Artificial Intelligence and Statistics*, pages 1608–1617. PMLR, 2018.
- [26] A. Godichon and B. Portier. An averaged projected robbins-monro algorithm for estimating the parameters of a truncated spherical distribution. *Electronic Journal of Statistics*, 11(1):1890–1927, 2017.
- [27] Y. Guo. pyomt: A pytorch implementation of adaptive monte carlo optimal transport. <https://github.com/k2cu8/pyOMT>, 2024. Accessed: 2025-05-07.
- [28] J.-C. Hütter and P. Rigollet. Minimax estimation of smooth optimal transport maps. *The Annals of Statistics*, 49(2), 2021.
- [29] V. Khrulkov and I. Oseledets. Understanding ddpm latent codes through optimal transport. *ArXiv*, abs/2202.07477, 2022. URL <https://api.semanticscholar.org/CorpusID:246863713>.
- [30] D. P. Kingma and J. Ba. Adam: A method for stochastic optimization. *arXiv preprint arXiv:1412.6980*, 2014.
- [31] J. Kitagawa, Q. Mérigot, and B. Thibert. A newton algorithm for semi-discrete optimal transport. *Journal of the European Mathematical Society*, 21, 03 2016. doi: 10.4171/JEMS/889.
- [32] J. Kitagawa, Q. Mérigot, and B. Thibert. Convergence of a newton algorithm for semi-discrete optimal transport. *Journal of the European Mathematical Society*, 21(9):2603–2651, 2019.
- [33] A. Korotin, D. Selikhanovych, and E. Burnaev. Neural optimal transport. *arXiv preprint arXiv:2201.12220*, 2022.
- [34] J. J. Kosowsky and A. L. Yuille. The invisible hand algorithm: Solving the assignment problem with statistical physics. *Neural Networks*, 7:477–490, 1994. URL <https://api.semanticscholar.org/CorpusID:6967348>.
- [35] B. Lévy. A numerical algorithm for  $l_2$  semi-discrete optimal transport in 3d. *ESAIM: Mathematical Modelling and Numerical Analysis*, 49(6):1693–1715, 2015.
- [36] Z. Li, S. Li, Z. Wang, N. Lei, Z. Luo, and D. X. Gu. Dpm-ot: a new diffusion probabilistic model based on optimal transport. In *Proceedings of the IEEE/CVF International Conference on Computer Vision*, pages 22624–22633, 2023.
- [37] A. Mensch and G. Peyré. Online sinkhorn: optimal transport distances from sample streams. In *Proceedings of the 34th International Conference on Neural Information Processing Systems, NIPS’20*, Red Hook, NY, USA, 2020. Curran Associates Inc. ISBN 9781713829546.

- [38] Q. Mérigot. A multiscale approach to optimal transport. In *Computer Graphics Forum*, volume 30, pages 1583–1592. Wiley Online Library, 2011.
- [39] A. Mokkadem and M. Pelletier. A generalization of the averaging procedure: The use of two-time-scale algorithms. *SIAM Journal on Control and Optimization*, 49(4):1523–1543, 2011.
- [40] M. Nutz and J. Wiesel. Entropic optimal transport: Convergence of potentials. *Probability Theory and Related Fields*, 184(1-2):401–424, 2022.
- [41] M. Pelletier. Asymptotic almost sure efficiency of averaged stochastic algorithms. *SIAM Journal on Control and Optimization*, 39(1):49–72, 2000.
- [42] G. Peyré, M. Cuturi, et al. Computational optimal transport: With applications to data science. *Foundations and Trends® in Machine Learning*, 11(5-6):355–607, 2019.
- [43] B. T. Polyak and A. B. Juditsky. Acceleration of stochastic approximation by averaging. *SIAM journal on control and optimization*, 30(4):838–855, 1992.
- [44] A.-A. Pooladian and J. Niles-Weed. Entropic estimation of optimal transport maps. *arXiv preprint arXiv:2109.12004*, 2021.
- [45] A.-A. Pooladian, V. Divol, and J. Niles-Weed. Minimax estimation of discontinuous optimal transport maps: The semi-discrete case. In *International Conference on Machine Learning*, pages 28128–28150. PMLR, 2023.
- [46] F. Santambrogio. *Optimal transport for applied mathematicians*. Progress in nonlinear differential equations and their applications. Birkhauser, 1 edition, Oct. 2015.
- [47] G. Schiebinger, J. Shu, M. Tabaka, B. Cleary, V. Subramanian, A. Solomon, J. Gould, S. Liu, S. Lin, P. Berube, et al. Optimal-transport analysis of single-cell gene expression identifies developmental trajectories in reprogramming. *Cell*, 176(4):928–943, 2019.
- [48] B. Schmitzer. Stabilized sparse scaling algorithms for entropy regularized transport problems. *SIAM Journal on Scientific Computing*, 41(3):A1443–A1481, 2019. doi: 10.1137/16M1106018. URL <https://doi.org/10.1137/16M1106018>.
- [49] B. Schmitzer. Stabilized sparse scaling algorithms for entropy regularized transport problems. *SIAM Journal On Scientific Computing*, 41:A1443–A1481, 2019.
- [50] F. Schopfer. Linear convergence of descent methods for the unconstrained minimization of restricted strongly convex functions. *SIAM Journal on Optimization*, 26(3):1883–1911, 2016.
- [51] V. Seguy, B. B. Damodaran, R. Flamary, N. Courty, A. Rolet, and M. Blondel. Large-scale optimal transport and mapping estimation. *arXiv preprint arXiv:1711.02283*, 2017.
- [52] M. Sharify, S. Gaubert, and L. Grigori. Solution of the optimal assignment problem by diagonal scaling algorithms. *arXiv preprint arXiv:1104.3830*, 2011.
- [53] R. Sinkhorn. Diagonal equivalence to matrices with prescribed row and column sums. *The American Mathematical Monthly*, 74(4):402–405, 1967.
- [54] B. Taşkesen, S. Shafieezadeh-Abadeh, and D. Kuhn. Semi-discrete optimal transport: Hardness, regularization and numerical solution. *Mathematical Programming*, 199(1):1033–1106, 2023.
- [55] A. Vacher and F.-X. Vialard. Semi-dual unbalanced quadratic optimal transport: fast statistical rates and convergent algorithm. In *Proceedings of the 40th International Conference on Machine Learning, ICML’23*. JMLR.org, 2023.
- [56] C. Villani. *Optimal transport: old and new*, volume 338. Springer, 2009.
- [57] J. Weed and F. Bach. Sharp asymptotic and finite-sample rates of convergence of empirical measures in wasserstein distance. *Bernoulli*, 25, 06 2017. doi: 10.3150/18-BEJ1065.
- [58] H. Zhang and W. Yin. Gradient methods for convex minimization: better rates under weaker conditions. *arXiv preprint arXiv:1303.4645*, 2013.

## NeurIPS Paper Checklist

### 1. Claims

Question: Do the main claims made in the abstract and introduction accurately reflect the paper's contributions and scope?

Answer: [\[Yes\]](#)

Justification: Proofs and numerical experiments are given for all the claims made in the abstract and the introduction.

### 2. Limitations

Question: Does the paper discuss the limitations of the work performed by the authors?

Answer: [\[Yes\]](#)

Justification: The main limitations, such as the assumptions or dependence on specific parameters, are clearly stated in the paper.

### 3. Theory Assumptions and Proofs

Question: For each theoretical result, does the paper provide the full set of assumptions and a complete (and correct) proof?

Answer: [\[Yes\]](#)

Justification: The assumptions are always clearly stated and all the proofs are given in appendix.

### 4. Experimental Result Reproducibility

Question: Does the paper fully disclose all the information needed to reproduce the main experimental results of the paper to the extent that it affects the main claims and/or conclusions of the paper (regardless of whether the code and data are provided or not)?

Answer: [\[Yes\]](#)

Justification: All the settings for the experiments are clearly stated and the parameters of our algorithm are given.

### 5. Open access to data and code

Question: Does the paper provide open access to the data and code, with sufficient instructions to faithfully reproduce the main experimental results, as described in supplemental material?

Answer: [\[Yes\]](#)

Justification: All the code to reproduce our experiments is provided in Python Notebooks and attached in a zip file in the supplementary materials.

### 6. Experimental Setting/Details

Question: Does the paper specify all the training and test details (e.g., data splits, hyperparameters, how they were chosen, type of optimizer, etc.) necessary to understand the results?

Answer: [\[Yes\]](#)

Justification: The parameters of our algorithm are given at the beginning of the Numerical Experiments section, and the example settings are explicitly provided.

### 7. Experiment Statistical Significance

Question: Does the paper report error bars suitably and correctly defined or other appropriate information about the statistical significance of the experiments?

Answer: [\[Yes\]](#)

Justification: All the experiments are run several times, and the error plots represent the average error across the experiments.

### 8. Experiments Compute Resources

Question: For each experiment, does the paper provide sufficient information on the computer resources (type of compute workers, memory, time of execution) needed to reproduce the experiments?

535 Answer: [Yes]  
 536 Justification: No specific computing resources are required for our experiments; they can  
 537 be run on any modern machine, even without a GPU. The only exception is the Neural OT  
 538 algorithm, which does require a GPU.

539 **9. Code Of Ethics**  
 540 Question: Does the research conducted in the paper conform, in every respect, with the  
 541 NeurIPS Code of Ethics <https://neurips.cc/public/EthicsGuidelines?>  
 542 Answer: [Yes]  
 543 Justification: The authors have read the NeurIPS Code of Ethics and guarantee that the paper  
 544 conforms to it.

545 **10. Broader Impacts**  
 546 Question: Does the paper discuss both potential positive societal impacts and negative  
 547 societal impacts of the work performed?  
 548 Answer: [NA]

549 **11. Safeguards**  
 550 Question: Does the paper describe safeguards that have been put in place for responsible  
 551 release of data or models that have a high risk for misuse (e.g., pretrained language models,  
 552 image generators, or scraped datasets)?  
 553 Answer: [NA]

554 **12. Licenses for existing assets**  
 555 Question: Are the creators or original owners of assets (e.g., code, data, models), used in  
 556 the paper, properly credited and are the license and terms of use explicitly mentioned and  
 557 properly respected?  
 558 Answer: [Yes]  
 559 Justification: The code provided is original and is included for reproducibility under the  
 560 correct license.

561 **13. New Assets**  
 562 Question: Are new assets introduced in the paper well documented and is the documentation  
 563 provided alongside the assets?  
 564 Answer: [Yes]  
 565 Justification: The algorithms and experiments are clearly explained in the paper, and the  
 566 code to reproduce the experiments is provided in an anonymized zip file.

567 **14. Crowdsourcing and Research with Human Subjects**  
 568 Question: For crowdsourcing experiments and research with human subjects, does the paper  
 569 include the full text of instructions given to participants and screenshots, if applicable, as  
 570 well as details about compensation (if any)?  
 571 Answer: [NA]

572 **15. Institutional Review Board (IRB) Approvals or Equivalent for Research with Human**  
 573 **Subjects**  
 574 Question: Does the paper describe potential risks incurred by study participants, whether  
 575 such risks were disclosed to the subjects, and whether Institutional Review Board (IRB)  
 576 approvals (or an equivalent approval/review based on the requirements of your country or  
 577 institution) were obtained?  
 578 Answer: [NA]

579 **16. Declaration of LLM usage**  
 580 Question: Does the paper describe the usage of LLMs if it is an important, original, or  
 581 non-standard component of the core methods in this research? Note that if the LLM is used  
 582 only for writing, editing, or formatting purposes and does not impact the core methodology,  
 583 scientific rigorousness, or originality of the research, declaration is not required.  
 584 Answer: [NA]

585

586

587

# Supplementary Material

588

589

## Table of Contents

590

591

592

593

594

595

596

597

598

599

600

601

602

603

604

605

606

607

|          |                                                                                                              |           |
|----------|--------------------------------------------------------------------------------------------------------------|-----------|
| <b>A</b> | <b>Additonnal Experiments . . . . .</b>                                                                      | <b>16</b> |
| A.1      | Mini-batch DRAG. . . . .                                                                                     | 16        |
| A.2      | Weighted Averaging: Maintaining a better trade-off between averaged and non-averaged iterations. . . . .     | 16        |
| A.3      | DRAG compared to Adam. . . . .                                                                               | 17        |
| A.4      | DRAG compared to non regularized ASGD . . . . .                                                              | 17        |
| <b>B</b> | <b>Proofs . . . . .</b>                                                                                      | <b>18</b> |
| B.1      | Proof of Theorem 1: Convergence rate of the non averaged iterates. . . . .                                   | 18        |
| B.2      | Proof of Theorem 2: Convergence rate of DRAG . . . . .                                                       | 21        |
| B.3      | Proof of Theorem 3: Convergence of the OT map estimator . . . . .                                            | 24        |
| B.4      | Proof of Corollary 1: OT cost estimation . . . . .                                                           | 25        |
| B.5      | Proof of Proposition 2: High probability being in $B(\mathbf{g}_{\varepsilon_t}^*, \varepsilon_t)$ . . . . . | 26        |
| B.6      | Proof of Lemma 1: Projection step . . . . .                                                                  | 30        |
| B.7      | Proof of Lemma 2: Global and local RSC condition of $H_\varepsilon$ . . . . .                                | 31        |
| B.8      | Other Technical results . . . . .                                                                            | 33        |

## 608 A Additonnal Experiments

### 609 A.1 Mini-batch DRAG.

610 As for Vanilla SGD, we can take advantage of GPU parallelization and replace the gradient estimator  
 611 using one sample  $X \sim \mu$

$$\nabla_{\mathbf{g}} h_{\varepsilon}(X, \mathbf{g})$$

612 by a mini-batch estimator, using  $n_b \geq 1$  i.i.d samples  $X_1, \dots, X_{n_b}$  samples of the source measure at  
 613 once

$$\frac{1}{n_b} \sum_{k=0}^{n_b} \nabla_{\mathbf{g}} h_{\varepsilon}(X_k, \mathbf{g}). \quad (7)$$

614 Of course, no matter the choice  $n_b$ , (7) defines an unbiased estimator of  $\nabla H_{\varepsilon}(\mathbf{g})$ .

615 Using a mini-batch of size  $n_b$ , we suggest multiplying  $\gamma_1$  by  $\sqrt{n_b}$ , as is usual with mini-batch SGD.  
 616 The following figure shows the acceleration due to mini-batching on Example 1, 2 and 3, while  
 617 maintaining the same computational time when using a GPU. Indeed, each mini-batch estimator has  
 618 an error an order of magnitude lower than the non-batched ones, even with a small mini-batch size of  
 619  $n_b = 16$ .

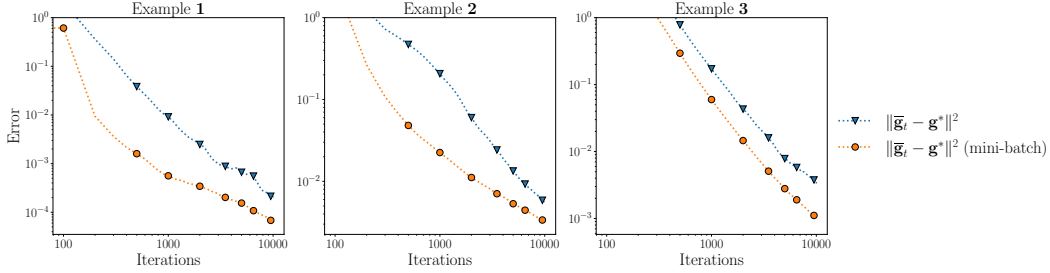

Figure 6: Comparison of the non mini-batched and mini-batched estimators on Example 1, 2 and 3,  $n_b = 16$ .

### 620 A.2 Weighted Averaging: Maintaining a better trade-off between averaged and non-averaged 621 iterations.

622 It is well known that the averaged algorithm can suffer from bad initialization. One strategy to over-  
 623 come this is weighted averaging [39]. Namely, we replace the averaged estimator  $\bar{\mathbf{g}}_t = \frac{1}{t+1} \sum_{k=0}^t \mathbf{g}_k$ ,  
 624 by

$$\bar{\mathbf{g}}_t^{(\omega)} := \frac{1}{\sum_{k=0}^t \log(k+1)^\omega} \sum_{k=0}^t \log(k+1)^\omega \mathbf{g}_k,$$

625 with a parameter  $\omega > 0$ . The parameter  $\omega$  balances the weights assigned to the estimators  $\mathbf{g}_k$ . As  
 626  $\omega$  increases, greater importance is given to the more recent estimates, while we retrieve  $\bar{\mathbf{g}}_t$  when  $\omega$   
 627 goes to 0. As for the usual averaged estimators, we can perform the weighted average online, without  
 628 having to store all the iterates, with the recursion

$$\bar{\mathbf{g}}_{t+1}^{(\omega)} = \left( 1 - \frac{\ln(t+1)^\omega}{\sum_{k=0}^t \ln(k+1)^\omega} \right) \bar{\mathbf{g}}_t^{(\omega)} + \frac{\ln(t+1)^\omega}{\sum_{k=0}^t \ln(k+1)^\omega} \mathbf{g}_{t+1}.$$

629 It is important to note that  $\bar{\mathbf{g}}_t^{(\omega)}$  will have the same asymptotic convergence guarantees as  $\bar{\mathbf{g}}_t$ .



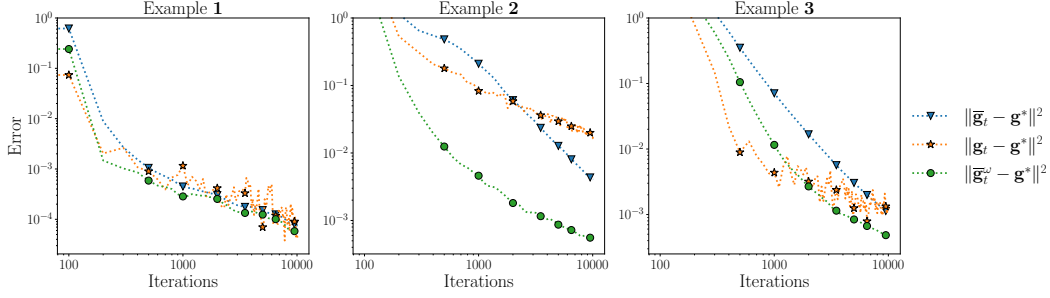

Figure 7: Comparison between  $\mathbf{g}_t$ ,  $\bar{\mathbf{g}}_t$  and  $\bar{\mathbf{g}}_t^{(\omega)}$  on Examples 1, 2 and 3, with  $\omega = 2$

As illustrated in Figure 7, the weighted average estimator consistently outperforms  $\bar{\mathbf{g}}_t$ , achieving orders of magnitude better performance in Examples 2 and 3. Note that a mini-batch size of 16 was used for all experiments, each repeated 10 times.

### A.3 DRAG compared to Adam.

We compare here the performance of our algorithm DRAG to that of the Adam algorithm [30], on Example 1, with  $M \in 200, 2000$ . The experiment was repeated 10 times. For this comparison, we fixed the parameters of DRAG to  $(\sqrt{M}, 1/3, 2/3)$  and ran the algorithm for  $t = 10^5$  iterations. The parameters for Adam were set to  $\beta_1 = 0.9$ ,  $\beta_2 = 0.999$ , and  $\lambda = 10^{-3}$  (learning rate/weight decay). As shown in Figure 8, DRAG clearly outperforms Adam on this example, particularly in the early iterations and as the number of points increases.

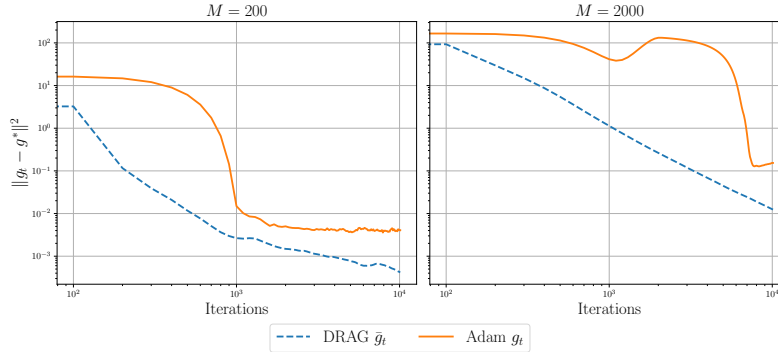

Figure 8: Comparison of DRAG with Adam on Example 1, for different values of  $M$ .

### A.4 DRAG compared to non regularized ASGD

As discussed in the numerical section, we observed empirically that all methods, including the non-regularized projected ASGD, eventually converge to the true solution given a sufficient number of iterations. In Figure 9, we report additional experiments with a larger iteration budget to confirm this behavior. Notably, even the non-regularized ASGD converges, albeit much more slowly. In contrast, DRAG converges significantly faster and achieves higher accuracy earlier in the optimization process. Among the DRAG variants, we observe that choices of  $a \in 0.2, 0.4$  yield the best performance, which aligns with our theoretical analysis suggesting that  $a = \frac{1}{3}^-$  achieves the optimal convergence rate in this setting, since  $b = \frac{2}{3}$ . These results reinforce our claim from the main text that, while all schemes converge given enough iterations, DRAG remains consistently one to two orders of magnitude more accurate due to its improved early-stage performance (see Appendix A).

Note also that the convergence of the non-regularized ASGD is encouraging, as it highlights that, with a sufficiently large number of steps, the effect of vanishing regularization is not a deterrent. Indeed, as  $t \rightarrow \infty$ , the regularized gradient becomes numerically indistinguishable from the non-regularized one, essentially corresponding to the difference between a tempered softmax with temperature  $\varepsilon$  and

an argmax. This further supports the view that DRAG serves as an effective acceleration mechanism in the early stages of optimization and that by decreasing the regularization, we will not hit a plateau.

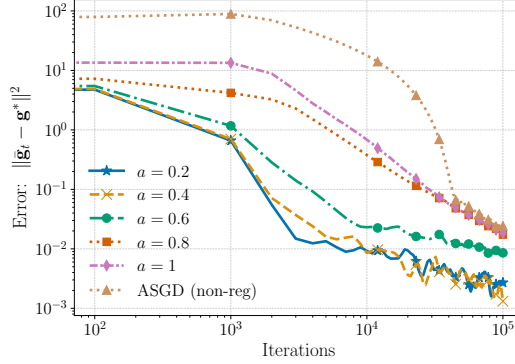

Figure 9: Comparison of DRAG with different  $a$  and non-regularized ASGD

## B Proofs

### Additional notations.

For any  $c > 0$  we define the function  $t \mapsto \Psi_c(t)$  such that

$$\sum_{t=1}^T t^{-c} \leq \Psi_c(T) := \begin{cases} 1 + \ln(T+1) & \text{if } c = 1, \\ \frac{2c-1}{c-1} & \text{if } c > 1, \\ 1 + \frac{1}{1-c}(T+1)^{1-c} & \text{if } c < 1. \end{cases} \quad (8)$$

For a sequence  $(u_t)_{t \in \mathbb{N}}$ , if  $\frac{t}{2} \notin \mathbb{N}$ ,  $u_{\frac{t}{2}}$  must be understood as  $u_{\lceil \frac{t}{2} \rceil}$ .

In all the sequel, we note

$$\Delta_t = \|\mathbf{g}_t - \mathbf{g}_{\varepsilon_t}^*\|^2.$$

Remark that the dependence in  $t$  is both in the estimator  $\mathbf{g}_t$  and the optimizer  $\mathbf{g}_{\varepsilon_t}^*$ . We also recall that we note  $D_C := \sup_{\mathbf{g}, \mathbf{g}' \in C} \|\mathbf{g} - \mathbf{g}'\| < \infty$ .

### B.1 Proof of Theorem 1: Convergence rate of the non averaged iterates.

*Proof.* Using Lemma 3, for any  $t \geq t_{a,\alpha}$ , we have

$$\Delta_{t+1} \leq \Delta_t - 2\gamma_{t+1} \langle \nabla_{\mathbf{g}} h_{\varepsilon_t}(\mathbf{g}_t, X_{t+1}), \mathbf{g}_t - \mathbf{g}_{\varepsilon_t}^* \rangle + 5\gamma_{t+1}^2.$$

Let  $\mathcal{F}_t$  denote the filtration generated by the samples  $X_1, \dots, X_t \stackrel{\text{iid}}{\sim} \mu$ , that is  $\mathcal{F}_t = \sigma(X_1, \dots, X_t)$  and taking the conditional expectation, we have

$$\mathbb{E}[\Delta_{t+1} | \mathcal{F}_t] \leq \Delta_t - 2\gamma_{t+1} \langle \nabla H_{\varepsilon_t}(\mathbf{g}_t), \mathbf{g}_t - \mathbf{g}_{\varepsilon_t}^* \rangle + 5\gamma_t^2. \quad (9)$$

Using Lemma 2 on the restricted strong convexity of  $H_{\varepsilon_t}$ , we have

$$\langle \nabla H_{\varepsilon_t}(\mathbf{g}_t), \mathbf{g}_t - \mathbf{g}_{\varepsilon_t}^* \rangle \geq \rho_*(1 - e^{-1}) \|\mathbf{g}_t - \mathbf{g}_{\varepsilon_t}^*\|^2 \mathbb{1}_{\|\mathbf{g}_t - \mathbf{g}_{\varepsilon_t}^*\| \leq \varepsilon_t/2}.$$

Therefore, we have

$$\mathbb{E}[\Delta_{t+1} | \mathcal{F}_t] \leq [1 - 2\rho_*(1 - e^{-1})\gamma_{t+1}] \Delta_t + \left[ 2\rho_*(1 - e^{-1}) \mathbb{1}_{\|\mathbf{g}_t - \mathbf{g}_{\varepsilon_t}^*\| \geq \varepsilon_t/2} \right] \gamma_{t+1} \Delta_t + 5\gamma_{t+1}^2. \quad (10)$$

Using Proposition 2, for all  $p$  and  $\beta \in (0, 1)$ , there exists  $C_{\beta,p}$  such that for all  $t \geq 0$ ,  $\mathbb{E}[\Delta_t^p] \leq C_{\beta,p} \frac{\gamma_t^p \varepsilon_t^{\beta p}}{\varepsilon_t^p} \leq C_{\beta,p} t^{-bp+a(1-\beta)p}$ . Therefore,

$$\begin{aligned} \mathbb{E}[\mathbb{1}_{\|\mathbf{g}_t - \mathbf{g}_{\varepsilon_t}^*\| \geq \varepsilon_t/2}] &= \mathbb{E}[\mathbb{1}_{\|\mathbf{g}_t - \mathbf{g}_{\varepsilon_t}^*\|^{2p} \geq \varepsilon_t^{2p}/2^p}] \\ &\leq C_{\beta,p} t^{-bp+ap(3-\beta)} \quad \text{by Markov's inequality} \\ &\leq C_{\beta, \frac{4b}{b-a(3-\beta)}} t^{-4b} \quad \text{taking } p = \frac{4b}{b-a(3-\beta)}, \text{ with } a(3-\beta) < b. \end{aligned} \quad (11)$$

Note that, since  $2a < b$ , we can always choose  $\beta$  such that the inequality  $a(3-\beta) < b$  holds. Using the fact that  $\Delta_t \leq D_C^2$  and taking the expectation in (10), we obtain

$$\mathbb{E}[\Delta_{t+1}] \leq [1 - 2\rho_*(1 - e^{-1})\gamma_{t+1}] \mathbb{E}[\Delta_t] + 5\gamma_{t+1}^2 + C_{\beta, \frac{4b}{b-a(3-\beta)}} t^{-5b} D_C^2.$$

Let  $t_\gamma := \min\{t, 2\lambda\gamma_{t+1} \leq 1\}$  and  $t_0 := \max\{t_{a,\alpha}, t_\gamma\}$ , we apply Proposition 5 to obtain

$$\mathbb{E}[\Delta_t] \leq \exp\left(-2\lambda \sum_{i=t_0+1}^t \gamma_i\right) \left(D_C^2 + \sum_{k=t_0}^t 5\gamma_k^2\right) + \frac{5}{2\lambda} \gamma_{\frac{t}{2}-1} + o(\gamma_t). \quad (12)$$

Applying Corollary 2, the exponential product converges exponentially fast to 0 and an asymptotic comparison gives

$$\mathbb{E}[\Delta_t] \leq \frac{5}{2\rho^*(1 - e^{-1})} \gamma_{\frac{t}{2}-1} + o(\gamma_t) \lesssim \frac{\gamma_t}{\rho^*}.$$

We conclude by using Proposition 1, using the bound  $\|\mathbf{g}_{\varepsilon_t}^* - \mathbf{g}^*\| \lesssim \varepsilon_t^{1+\alpha'}$ .

□

**Proposition 3.** Under the same assumptions as in Theorem 1, we have for any  $\alpha' \in (0, \alpha)$

$$\mathbb{E}[\|\mathbf{g}_t - \mathbf{g}^*\|^2] \lesssim \frac{1}{\rho_*^2 \cdot t^{2b}} + \frac{1}{t^{4a+4a\alpha'}}, \quad t \geq 1.$$

**Remark:** Note that this proposition directly proves Theorem 1, but we decided to split them, to have a cleaner proof of Theorem 1.

*Proof.* We begin by squaring equation (13) of Lemma 3. For  $t \geq t_{a,\alpha}$ , where  $t_{a,\alpha}$  is defined in (15), we have

$$\begin{aligned} \Delta_{t+1}^2 &\leq (\Delta_t - 2\gamma_{t+1} \langle \nabla_{\mathbf{g}} h_{\varepsilon_t}(\mathbf{g}_t, X_{t+1}), \mathbf{g}_t - \mathbf{g}_{\varepsilon_t}^* \rangle + 5\gamma_{t+1}^2)^2 \\ &\leq \Delta_t^2 + 4\gamma_{t+1}^2 \langle \nabla_{\mathbf{g}} h_{\varepsilon_t}(\mathbf{g}_t, X_{t+1}), \mathbf{g}_t - \mathbf{g}_{\varepsilon_t}^* \rangle^2 + 25\gamma_{t+1}^4 \\ &\quad - \underbrace{4\Delta_t \gamma_{t+1} \langle \nabla_{\mathbf{g}} h_{\varepsilon_t}(\mathbf{g}_t, X_{t+1}), \mathbf{g}_t - \mathbf{g}_{\varepsilon_t}^* \rangle}_{=:A} + 10\Delta_t \gamma_{t+1}^2 - \underbrace{20\gamma_{t+1}^3 \langle \nabla_{\mathbf{g}} h_{\varepsilon_t}(\mathbf{g}_t, X_{t+1}), \mathbf{g}_t - \mathbf{g}_{\varepsilon_t}^* \rangle}_{=:B}. \end{aligned}$$

Taking the conditional and using Lemma 2, we have

$$\mathbb{E}[A \mid \mathcal{F}_t] \geq 4\Delta_t^2 \rho_*(1 - e^{-1})\gamma_{t+1} \mathbb{1}_{\|\mathbf{g}_t - \mathbf{g}_{\varepsilon_t}\| \leq \varepsilon_t/2}.$$

We also use the simple bound

$$\mathbb{E}[B \mid \mathcal{F}_t] \geq 0.$$

These two inequalities lead to

$$\begin{aligned} \mathbb{E}[\Delta_t^2 \mid \mathcal{F}_t] &\leq [1 - 4\rho_*(1 - e^{-1})\gamma_{t+1}] \Delta_t^2 + 4\rho_*(1 - e^{-1})\gamma_{t+1} \mathbb{1}_{\|\mathbf{g}_t - \mathbf{g}_{\varepsilon_t}\| \leq \varepsilon_t/2} \\ &\quad + 4\gamma_{t+1}^2 \mathbb{E}[\langle \nabla h_{\varepsilon_t}(\mathbf{g}_t, X_{t+1}), \mathbf{g}_t - \mathbf{g}_{\varepsilon_t}^* \rangle^2 \mid \mathcal{F}_t] + 25\gamma_{t+1}^4 + 5\Delta_t \gamma_{t+1}^2. \end{aligned}$$

687 Using that the gradient norm is bounded by two, we apply the Cauchy-Schwarz inequality to obtain

$$4\gamma_{t+1}^2 \langle \nabla_{\mathbf{g}} h_{\varepsilon_t}(\mathbf{g}_t, X_{t+1}), \mathbf{g}_t - \mathbf{g}_{\varepsilon_t}^* \rangle^2 \leq 16\gamma_{t+1}^2 \|\mathbf{g}_t - \mathbf{g}_{\varepsilon_t}^*\|^2 \leq 16\Delta_t \gamma_{t+1}^2.$$

688 Applying Hölder's inequality yields

$$\begin{aligned} 21\Delta_t \gamma_{t+1}^2 &\leq \left( \Delta_t \sqrt{2\rho_*(1-e^{-1})} \frac{1}{\sqrt{2\rho_*(1-e^{-1})}} 21\gamma_{t+1} \right) \gamma_{t+1} \\ &\leq \gamma_{t+1} \Delta_t^2 \rho_*(1-e^{-1}) + \frac{21^2}{4\rho_*(1-e^{-1})} \gamma_{t+1}^3. \end{aligned}$$

689 Summing up these inequalities, we obtain

$$\begin{aligned} \mathbb{E}[\Delta_{t+1}^2 \mid \mathcal{F}_t] &\leq [1 - 3\rho_*(1-e^{-1})\gamma_{t+1}] \Delta_t^2 + 4\rho_*(1-e^{-1})\gamma_{t+1} \mathbb{1}_{\|\mathbf{g}_t - \mathbf{g}_{\varepsilon_t}^*\| \geq \varepsilon_t/2} \\ &\quad + \frac{21^2}{4\rho_*(1-e^{-1})} \gamma_{t+1}^3 + 25\gamma_{t+1}^4. \end{aligned}$$

690 Similarly to the case  $p = 1$ , using that  $\mathbb{P}[\|\mathbf{g}_t - \mathbf{g}_{\varepsilon_t}^*\| \geq \varepsilon_t/2] \leq C_{\beta, \frac{4b}{b-a(3-\beta)}} t^{-4b}$  by (11) and that

691  $\Delta_t^2 \leq D_C^4$  for all  $t$ , taking the expectation yields

$$\mathbb{E}[\Delta_{t+1}^2] \leq (1 - 3\lambda\gamma_{t+1})\mathbb{E}[\Delta_t^2] + \frac{21^2}{4\lambda} \gamma_{t+1}^3 + 25\gamma_{t+1}^4 + 4\lambda C_{\beta, \frac{4b}{b-a(3-\beta)}} t^{-5b} D_C^4.$$

692 Again, as in the case  $p = 1$ , applying Proposition 5 and Corollary 2 and using that  $\|\mathbf{g}_{\varepsilon_t}^* - \mathbf{g}^*\| \lesssim \varepsilon_t^{1+\alpha'}$   
693 concludes the proof.

694 □

695 **Lemma 3.** *Under the assumptions of Theorem 1, there exists a finite time  $t_{a,\alpha}$ , depending on  $a$  and*  
696  *$\alpha$ , such that for all  $t \geq t_{a,\alpha}$ , we have*

$$\Delta_{t+1} \leq \Delta_t - 2\gamma_{t+1} \langle \nabla_{\mathbf{g}} h_{\varepsilon_t}(\mathbf{g}_t, X_{t+1}), \mathbf{g}_t - \mathbf{g}_{\varepsilon_t}^* \rangle + 5\gamma_{t+1}^2. \quad (13)$$

697 *Proof.* By definition of the gradient step at time  $t + 1$  and since  $\mathbf{g}_{\varepsilon_{t+1}}^* \in \mathcal{C}$ , we have

$$\begin{aligned} \Delta_{t+1} &= \|\mathbf{g}_{t+1} - \mathbf{g}_{\varepsilon_{t+1}}^*\|^2 \\ &= \|\text{Proj}_{\mathcal{C}}(\mathbf{g}_t - \gamma_{t+1} \nabla_{\mathbf{g}} h_{\varepsilon_t}(\mathbf{g}_t, X_{t+1})) - \mathbf{g}_{\varepsilon_{t+1}}^*\|^2 \\ &\leq \|\mathbf{g}_t - \gamma_{t+1} \nabla_{\mathbf{g}} h_{\varepsilon_t}(\mathbf{g}_t, X_{t+1}) - \mathbf{g}_{\varepsilon_{t+1}}^*\|^2. \end{aligned}$$

698 Then, incorporating the change of optimum between time  $t$  and  $t + 1$ , we get

$$\begin{aligned} \Delta_{t+1} &\leq \|\mathbf{g}_t - \gamma_{t+1} \nabla_{\mathbf{g}} h_{\varepsilon_t}(\mathbf{g}_t, X_{t+1}) - \mathbf{g}_{\varepsilon_t}^* + \mathbf{g}_{\varepsilon_t}^* - \mathbf{g}_{\varepsilon_{t+1}}^*\|^2 \\ &\leq \|\mathbf{g}_t - \gamma_{t+1} \nabla_{\mathbf{g}} h_{\varepsilon_t}(\mathbf{g}_t, X_{t+1}) - \mathbf{g}_{\varepsilon_t}^*\|^2 + 2 \left\langle \mathbf{g}_t - \gamma_{t+1} \nabla_{\mathbf{g}} h_{\varepsilon_t}(\mathbf{g}_t, X_{t+1}) - \mathbf{g}_{\varepsilon_t}^*, \mathbf{g}_{\varepsilon_t}^* - \mathbf{g}_{\varepsilon_{t+1}}^* \right\rangle \\ &\quad + \|\mathbf{g}_{\varepsilon_t}^* - \mathbf{g}_{\varepsilon_{t+1}}^*\|^2. \end{aligned}$$

699 Using Corollary 2.2 in [18] (see Proposition 1), there exists  $K_0 > 0$  such that for any  $\alpha' \in ]0, \alpha[$

$$\|\mathbf{g}_{\varepsilon_t}^* - \mathbf{g}_{\varepsilon_{t+1}}^*\| \leq K_0 \varepsilon_t^{\alpha'} (\varepsilon_t - \varepsilon_{t+1}) \leq K_0 t^{-a\alpha'} (t^{-a} - (t+1)^{-a}) \leq aK_0 t^{-(1+a+\alpha\alpha')}. \quad (14)$$

700 For clarity, we define  $r_t := aK_0 t^{-(1+a+\alpha\alpha')}$  and  $R_t := (2D_C + 2\gamma_{t+1} + r_t)r_t$ .

701 Using that for all  $t$ ,  $\mathbf{g}_t \in \mathcal{C}$ , and that for all  $x \in \mathbb{R}^d$ ,  $\mathbf{g} \in \mathbb{R}^M$ ,  $\|\nabla_{\mathbf{g}} h_{\varepsilon_t}(\mathbf{g}, x)\| \leq 2$ , we obtain

$$\begin{aligned} \Delta_{t+1} &\leq \|\mathbf{g}_t - \gamma_{t+1} \nabla_{\mathbf{g}} h_{\varepsilon_t}(\mathbf{g}_t, X_{t+1}) - \mathbf{g}_{\varepsilon_t}^*\|^2 + (2D_C + 2\gamma_{t+1}) \|\mathbf{g}_{\varepsilon_t}^* - \mathbf{g}_{\varepsilon_{t+1}}^*\| + \|\mathbf{g}_{\varepsilon_t}^* - \mathbf{g}_{\varepsilon_{t+1}}^*\|^2 \\ &\leq \|\mathbf{g}_t - \gamma_{t+1} \nabla_{\mathbf{g}} h_{\varepsilon_t}(\mathbf{g}_t, X_{t+1}) - \mathbf{g}_{\varepsilon_t}^*\|^2 + R_t \\ &\leq \|\mathbf{g}_t - \mathbf{g}_{\varepsilon_t}^*\|^2 - 2\gamma_{t+1} \langle \nabla_{\mathbf{g}} h_{\varepsilon_t}(\mathbf{g}_t, X_{t+1}), \mathbf{g}_t - \mathbf{g}_{\varepsilon_t}^* \rangle + \gamma_{t+1}^2 \|\nabla_{\mathbf{g}} h_{\varepsilon_t}(\mathbf{g}_t, X_{t+1})\|^2 + R_t \\ &\leq \Delta_t - 2\gamma_{t+1} \langle \nabla_{\mathbf{g}} h_{\varepsilon_t}(\mathbf{g}_t, X_{t+1}), \mathbf{g}_t - \mathbf{g}_{\varepsilon_t}^* \rangle + 4\gamma_{t+1}^2 + R_t. \end{aligned}$$

702 Note that, since we have  $1 + a + a\alpha > 2b$ , we can also take  $\alpha' \in ]0, \alpha[$  such that  $1 + a + a\alpha' > 2b$ .  
 703 Consequently, the sequence  $R_t/\gamma_t^2$  is decreasing and tends to 0. For conciseness, we note

$$t_{a,\alpha} := \min \{t \geq 1 : R_t \leq \gamma_t^2\}. \quad (15)$$

704 For any  $t \geq t_{a,\alpha}$ , we then obtain the following upper bound of  $\Delta_{t+1}$  in terms of  $\Delta_t$  and the gradient  
 705 direction:

$$\Delta_{t+1} \leq \Delta_t - 2\gamma_{t+1} \langle \nabla_{\mathbf{g}} h_{\varepsilon_t}(\mathbf{g}_t, X_{t+1}), \mathbf{g}_t - \mathbf{g}_{\varepsilon_t}^* \rangle + 5\gamma_{t+1}^2.$$

706

□

## 707 B.2 Proof of Theorem 2: Convergence rate of DRAG

708 *Proof.* We start with a decomposition of the gradient step, similar to [26]. By abuse of notation, we  
 709 note

$$\nabla_*^2 := \nabla^2 H_0(\mathbf{g}_{\varepsilon_k}^*)$$

710 and define the following differences:

$$\begin{aligned} p_k &:= \text{Proj}_{\mathcal{C}}(\mathbf{g}_k - \gamma_{k+1} \nabla_{\mathbf{g}} h_{\varepsilon_k}(\mathbf{g}_k, X_{k+1})) - (\mathbf{g}_k - \gamma_{k+1} \nabla_{\mathbf{g}} h_{\varepsilon_k}(\mathbf{g}_k, X_{k+1})), \\ \xi_{k+1} &:= \nabla H_{\varepsilon_k}(\mathbf{g}_k) - \nabla_{\mathbf{g}} h_{\varepsilon_k}(\mathbf{g}_k, X_{k+1}), \\ \sigma_k &:= \nabla H_0(\mathbf{g}_k) - \nabla H_{\varepsilon_k}(\mathbf{g}_k) \\ \delta_k &:= \nabla H_0(\mathbf{g}_k) - \nabla_*^2(\mathbf{g}_k - \mathbf{g}_0^*). \end{aligned}$$

711 The term  $p_k$  represents the difference between the projected and non-projected steps. Note that  
 712  $p_k = 0$  if  $\mathbf{g}_k - \gamma_{k+1} \nabla_{\mathbf{g}} h_{\varepsilon_k}(\mathbf{g}_k, X_{k+1}) \in \mathcal{C}$ . The term  $\xi_k$  is a martingale difference  $\xi_k$  representing  
 713 the difference between the regularized gradient and its non-biased estimator.  $\sigma_k$  represents the  
 714 difference between the  $\varepsilon_k$ -regularized gradient and the non-regularized gradient. Finally,  $\delta_k$  represents  
 715 the difference between the gradient at  $\mathbf{g}_k$  and its linear approximation given by the Hessian at the  
 716 optimum.

717 Let  $I_M$  denote identity matrix of  $\mathcal{M}_M(\mathbb{R})$ , observe that for any  $k \in \mathbb{N}$

$$\begin{aligned} \mathbf{g}_{k+1} - \mathbf{g}_0^* &= \text{Proj}_{\mathcal{C}}(\mathbf{g}_k - \gamma_{k+1} \nabla_{\mathbf{g}} h_{\varepsilon_k}(\mathbf{g}_k, X_{k+1})) - \mathbf{g}_0^* \\ &= \mathbf{g}_k - \gamma_{k+1} \nabla_{\mathbf{g}} h_{\varepsilon_k}(\mathbf{g}_k, X_{k+1}) - \mathbf{g}_0^* - p_k && \text{incorporating } p_k \\ &= \mathbf{g}_k - \gamma_{k+1} \nabla H_{\varepsilon_k}(\mathbf{g}_k) - \mathbf{g}_0^* + \gamma_{k+1} \xi_{k+1} - p_k && \text{incorporating } \xi_{k+1} \\ &= \mathbf{g}_k - \gamma_{k+1} \nabla H_0(\mathbf{g}_k) + \gamma_{k+1} \sigma_k - \mathbf{g}_0^* + \gamma_{k+1} \xi_{k+1} - p_k && \text{incorporating } \sigma_k \\ &= (I_M - \gamma_{k+1} \nabla_k^2)(\mathbf{g}_k - \mathbf{g}_0^*) - \gamma_{k+1} \delta_k + \gamma_{k+1} \sigma_k + \gamma_{k+1} \xi_{k+1} + p_k. && \text{incorporating } \delta_k \end{aligned}$$

718 Thus, we have that

$$\nabla_*^2(\mathbf{g}_k - \mathbf{g}_0^*) = \frac{\mathbf{g}_k - \mathbf{g}_{k+1}}{\gamma_{k+1}} - \delta_k + \sigma_k + \xi_{k+1} + \frac{p_k}{\gamma_{k+1}}.$$

719 Observe that there is an orthogonal matrix  $U$  such that  $\nabla_*^2 = U \text{diag}(\lambda_1, \dots, \lambda_{M-1}, 0) U^\top$ . There-  
 720 fore, in the following, we denote

$$(\nabla^2)^{-1} = U \text{diag}(\lambda_1^{-1}, \dots, \lambda_{M-1}^{-1}, 0) U^\top$$

721 the inverse of  $\nabla_*^2$ , restricted to the subspace  $\text{Vect}(\mathbf{1}_M)^\perp$ . Note that we have [18, Theorem 3.2]

$$\min_{j \in \llbracket 1, M-1 \rrbracket} \lambda_j \geq \rho_*, \quad \text{for all } k \geq 0.$$

722 Taking all the equalities in  $\text{Vect}(\mathbf{1}_M)^\perp$ , that is, considering all our vectors in the subspace  
 723  $\text{Vect}(\mathbf{1}_M)^\perp$ , we have

$$\begin{aligned} (\bar{\mathbf{g}}_t - \mathbf{g}_0^*) &= \frac{1}{t+1} \sum_{k=0}^t (\nabla_*^2)^{-1} \frac{\mathbf{g}_k - \mathbf{g}_{k+1}}{\gamma_{k+1}} - \frac{1}{t+1} \sum_{k=0}^t (\nabla_*^2)^{-1} \delta_k \\ &\quad + \frac{1}{t+1} \sum_{k=0}^t \sigma_k + \frac{1}{t+1} \sum_{k=0}^t (\nabla_*^2)^{-1} \xi_{k+1} + \frac{1}{t+1} \sum_{k=0}^t (\nabla_*^2)^{-1} \frac{p_k}{\gamma_{k+1}}. \end{aligned}$$

724 We will now give the convergence rate for each sum. Note that thanks to the introduction of  $\sigma_k$ , we  
 725 will directly be able to use the local smoothness and strong convexity of  $H_0$ , proved in our setting in  
 726 [32].

727 • **Convergence rate for**  $\frac{1}{t+1} \sum_{k=0}^t \frac{\mathbf{g}_k - \mathbf{g}_{k+1}}{\gamma_{k+1}}$ .

$$\begin{aligned} \sum_{k=0}^t \frac{\mathbf{g}_k - \mathbf{g}_{k+1}}{\gamma_{k+1}} &= \sum_{k=0}^t \frac{(\mathbf{g}_k - \mathbf{g}^*) - (\mathbf{g}_{k+1} - \mathbf{g}^*)}{\gamma_{k+1}} \\ &= \sum_{k=0}^t \frac{\mathbf{g}_k - \mathbf{g}^*}{\gamma_{k+1}} - \sum_{k=0}^t \frac{\mathbf{g}_{k+1} - \mathbf{g}^*}{\gamma_{k+1}} \\ &= \sum_{k=1}^t \left( \frac{1}{\gamma_{k+1}} - \frac{1}{\gamma_k} \right) (\mathbf{g}_k - \mathbf{g}^*) + \frac{\mathbf{g}_0 - \mathbf{g}^*}{\gamma_1} - \frac{\mathbf{g}_{t+1} - \mathbf{g}^*}{\gamma_{t+1}}. \end{aligned}$$

728 Remark that  $\gamma_{t+1}^{-1} - \gamma_t^{-1} \leq 2\gamma_1^{-1}n^{b-1}$ . By Theorem 1 (non-averaged iterates),  $\mathbb{E} [\|\mathbf{g}_n - \mathbf{g}^*\|_v^2] \lesssim$   
 729  $\frac{\gamma_1}{\rho_*}(t+1)^{-b}$ . Therefore

$$\mathbb{E} \left[ \left\| \sum_{k=0}^t \frac{\mathbf{g}_k - \mathbf{g}_{k+1}}{\gamma_{k+1}} \right\|_v^2 \right]^{\frac{1}{2}} \lesssim \frac{1}{\rho_*} \Psi_{1-b/2}(t+1) + D_C \gamma_1^{-1} + \frac{1}{\sqrt{\gamma_1 \rho_*}} (t+1)^{b/2}.$$

730 We thus have the convergence rate

$$\frac{1}{t+1} \mathbb{E} \left[ \left\| \sum_{k=0}^t \frac{\mathbf{g}_k - \mathbf{g}_{k+1}}{\gamma_{k+1}} \right\|_v^2 \right]^{\frac{1}{2}} \lesssim \frac{1}{\rho_* (t+1)^{1-b/2}}.$$

731 • **Convergence rate for**  $\frac{1}{t+1} \sum_{k=0}^t \delta_k$ .

732 By [32, Theorem 1.3], there exists a ball  $B(\mathbf{g}^*, d_1)$  with  $d_1 > 0$  where  $H$  is  $\alpha$ -Hölder. Therefore, by  
 733 applying a Taylor expansion of  $\nabla H_0(\mathbf{g})$  around  $\mathbf{g}^*$ , if  $\mathbf{g}_k \in B(\mathbf{g}^*, d_1)$ , we have

$$\|\delta_k\| \lesssim \|\mathbf{g}_k - \mathbf{g}^*\|_v^{1+\alpha}.$$

734 Otherwise, since the Hessian  $H_0$  is uniformly bounded [32, Theorem 1.1], there exists a constant  $C_\delta$   
 735 such that for any  $\mathbf{g} \in \mathcal{C}$ ,  $\|\nabla H(\mathbf{g}) - \nabla^2 H(\mathbf{g}^*)(\mathbf{g} - \mathbf{g}^*)\| \leq C_\delta$ .

736 Since  $\mathbb{P}(\mathbf{g}_k \notin B(\mathbf{g}^*, d_1)) = \mathbb{P}(\|\mathbf{g}_k - \mathbf{g}^*\| > d_1)$ , we obtain by Markov's inequality

$$\begin{aligned} \mathbb{E}[\|\delta_k\|_v^2] &= \mathbb{E}[\|\delta_k\|_v^2 \mathbf{1}_{\mathbf{g}_k \in B(\mathbf{g}^*, d_1)}] + \mathbb{E}[\|\delta_k\|_v^2 \mathbf{1}_{\mathbf{g}_k \notin B(\mathbf{g}^*, d_1)}] \\ &\lesssim \mathbb{E}[\|\mathbf{g}_k - \mathbf{g}^*\|_v^{2+2\alpha}] + \frac{C_\delta^2}{d_1^{2+2\alpha}} \mathbb{E}[\|\mathbf{g}_n - \mathbf{g}^*\|_v^{2+2\alpha}] \\ &\lesssim \mathbb{E}[\|\mathbf{g}_k - \mathbf{g}^*\|_v^{2+2\alpha}]. \end{aligned}$$

737 Therefore, using Minkowski's inequality, we have

$$\begin{aligned} \frac{1}{t+1} \mathbb{E} \left[ \left\| \sum_{k=0}^t \delta_k \right\|_v^2 \right]^{\frac{1}{2}} &\lesssim \frac{1}{t+1} \sum_{k=0}^t \frac{1}{\rho_*^{\frac{1+\alpha}{2}}} \gamma_{k+1}^{\frac{1+\alpha}{2}} \\ &\leq \frac{1}{\rho_*^{\frac{1+\alpha}{2}} (t+1)} \Psi_{\frac{b+\alpha b}{2}} \\ &\lesssim \frac{1}{\rho_*^{\frac{1+\alpha}{2}} (t+1)^{\frac{b+\alpha b}{2}}}. \end{aligned}$$

738 • **Convergence rate for**  $\frac{1}{t+1} \sum_{k=0}^t \xi_{k+1}$ .

739 We recall that  $\xi_{k+1} = \nabla H(\mathbf{g}_k) - \nabla_{\mathbf{g}} h(\mathbf{g}_k, X_{k+1})$  and thus  $\mathbb{E}[\xi_{k+1}] = 0$ .

740 Observe that  $\mathbb{E} \left[ \left\langle \sum_{k=0}^{n-1} \xi_{k+1}, \xi_{t+1} \right\rangle_v \right] = \mathbb{E} \left[ \left\langle \sum_{k=0}^{n-1} \xi_{k+1}, \mathbb{E}[\xi_{t+1} | \mathcal{F}_t] \right\rangle_v \right] = 0$ .

741 Thus, since  $\mathbb{E}[\|\xi_k\|^2] \leq 4$  for all  $k$ , we have the convergence rate

$$\frac{1}{t+1} \mathbb{E} \left[ \left\| \sum_{k=0}^t \xi_{k+1} \right\|_v^2 \right]^{\frac{1}{2}} \leq \frac{2}{\sqrt{t+1}}.$$

742 • **Convergence rate of**  $\frac{1}{t+1} \sum_{k=0}^t \sigma_k$ .

743 Using Proposition 4, we have uniformly in  $\mathbf{g}_k \in \mathcal{C}$  that, for all  $\alpha' \in (0, \alpha)$ ,

$$\|\sigma_k\| = \|\nabla H_0(\mathbf{g}_k) - \nabla H_{\varepsilon_k}(\mathbf{g}_k)\| \lesssim \varepsilon^{1+\alpha'} \lesssim t^{a+\alpha'}.$$

744 Therefore

$$\begin{aligned} \frac{1}{t+1} \left\| \sum_{k=0}^t \sigma_k \right\| &\lesssim \frac{1}{t+1} \Psi_{a+\alpha'}(t) \\ &\lesssim \frac{1}{t^{a+\alpha'}}. \end{aligned}$$

745 • **Convergence rate for**  $\frac{1}{t+1} \sum_{k=0}^t \frac{p_k}{\gamma_k}$ .

746 Take  $d_0$  such that  $B(\mathbf{g}^*, d_0) \subset \mathcal{C}$ . Defining  $\nabla_k := \nabla_{\mathbf{g}} h(\mathbf{g}_k, X_{k+1})$  for conciseness, we obtain

$$\begin{aligned} \mathbb{E}[\|p_k\|_v^2] &= \mathbb{E}[\|\text{Proj}_{\mathcal{C}}(\mathbf{g}_k - \gamma_{k+1} \nabla_k) - (\mathbf{g}_k - \gamma_{k+1} \nabla_k)\|_v^2] \\ &= \mathbb{E}[\|\text{Proj}_{\mathcal{C}}(\mathbf{g}_k - \gamma_{k+1} \nabla_k) - (\mathbf{g}_k - \gamma_{k+1} \nabla_k)\|_v^2 \mathbf{1}_{\mathbf{g}_k - \gamma_{k+1} \nabla_k \notin \mathcal{C}}] \end{aligned}$$

747 Since for any  $y \in \mathcal{C}$ , one has  $\|x - \text{Proj}_{\mathcal{C}}(x)\|_v \leq \|x - y\|_v$ , taking  $y = \mathbf{g}_k$ , and since  $\mathbf{g}_k - \gamma_{k+1} \nabla_k \notin \mathcal{C}$   
748 is satisfied only if  $\|\mathbf{g}_k - \gamma_{k+1} \nabla_k - \mathbf{g}^*\|_v > d_0$ , we have

$$\begin{aligned} \mathbb{E}[\|p_k\|_v^2] &\leq \mathbb{E}[\|\gamma_{k+1} \nabla_k\|_v^2 \mathbf{1}_{\|\mathbf{g}_k - \gamma_{k+1} \nabla_k - \mathbf{g}^*\|_v > d_0}] \\ &\leq 4\gamma_{k+1}^2 \frac{\mathbb{E}[\|\mathbf{g}_k - \gamma_{k+1} \nabla_k - \mathbf{g}^*\|_v^4]}{d_0^4} \\ &\leq \frac{\gamma_{k+1}^2}{d_0^4} \left( 2^5 \mathbb{E}[\|\mathbf{g}_k - \mathbf{g}^*\|_v^4] + 2^9 \gamma_{k+1}^4 \right) \\ &\lesssim \frac{1}{\rho_*^2} \gamma_{k+1}^4 \end{aligned}$$

749 We thus have

$$\begin{aligned} \frac{1}{t+1} \mathbb{E} \left[ \left\| \sum_{k=0}^t \frac{p_k}{\gamma_k} \right\|_v^2 \right]^{\frac{1}{2}} &\lesssim \frac{1}{t+1} \sum_{k=0}^t \frac{\gamma_{k+1}}{\rho_*} \\ &\lesssim \frac{\gamma_1}{\rho_*(t+1)^b}. \end{aligned}$$

750 • **Conclusion.**

751 Finally, summing up all the convergence rates, using Cauchy-Schwarz inequality and that  $(A+B)^2 \leq$   
752  $2(A^2 + B^2)$  for any  $A, B \in \mathbb{R}$  we obtain

$$\mathbb{E}[\|\nabla^2 H(\mathbf{g}^*)(\bar{\mathbf{g}}_n - \mathbf{g}^*)\|_v^2] \lesssim \frac{1}{\rho_*^2(t+1)^{2-b}} + \frac{1}{t^{2a+2a\alpha'}} + \frac{1}{\rho_*^{\frac{1+\alpha}{\alpha}}(t+1)^{b+\alpha b}} + \frac{1}{t+1} + \frac{\gamma_1^4}{\rho_*^2(t+1)^{2b}}.$$

Since  $b > 2a$  and  $b + \alpha a > 2a + 2a\alpha'$  and so noting  $s = \min\{1, 2a + 2a\alpha'\}$ , and since the Hessian norm is uniformly bounded, we finally obtain

$$\mathbb{E} \left[ \|\bar{\mathbf{g}}_n - \mathbf{g}^*\|_v^2 \right] \lesssim \frac{1}{ts}.$$

□

### B.3 Proof of Theorem 3: Convergence of the OT map estimator

*Proof.* We show that the convergence rate of  $\bar{\mathbf{g}}_t$  to  $\mathbf{g}_0^*$  implies a convergence rate a convergence rate for the map estimation. The Brenier map is given by  $T_{\mu, \nu}(x) = x - \nabla(\mathbf{g}_0^*)^c(x)$ ; see for instance [46], Theorem 1.17. We thus focus on the convergence of  $\nabla \bar{\mathbf{g}}_t^c$  to  $\nabla(\mathbf{g}_0^*)^c$ .

For all  $j \in \llbracket 1, M \rrbracket$ , if  $x$  lies in the interior of  $\mathbb{L}_j(\mathbf{g})$ , we have

$$\nabla \mathbf{g}^c(x) = x - y_j. \quad (16)$$

Therefore, given  $\mathbf{g}, \mathbf{g}' \in \mathbb{R}^M$ , if there exists a  $j \in \llbracket 1, M \rrbracket$  such that  $x$  is the interior of  $\mathbb{L}_j(\mathbf{g}) \cap \mathbb{L}_j(\mathbf{g}')$  we have

$$\nabla \mathbf{g}^c(x) = \nabla(\mathbf{g}')^c(x).$$

We will now follow arguments from [46], Section 6.4.2. Fix  $j, j' \in \llbracket 1, M \rrbracket$  such that  $j \neq j'$  and  $x$  is in the interior of  $\mathbb{L}_j(\mathbf{g}) \cap \mathbb{L}_{j'}(\mathbf{g}')$ . By definition of the  $c$ -transform, we observe that  $\mathbb{L}_j(\mathbf{g})$  is defined by  $M - 1$  linear inequalities of the form

$$\langle x, y_{j'} - y_j \rangle \leq a_{\mathbf{g}}(j, j') := g_j - g_{j'} + \frac{1}{2}\|y_{j'}\|_2^2 - \frac{1}{2}\|y_j\|_2^2.$$

Similarly, interchanging the role of  $\mathbf{g}, \mathbf{g}'$  and  $j, j'$  we have

$$\langle x, y_j - y_{j'} \rangle \leq a_{\mathbf{g}'}(j', j) := g'_{j'} - g'_j + \frac{1}{2}\|y_j\|_2^2 - \frac{1}{2}\|y_{j'}\|_2^2.$$

We obtain that

$$\mathbb{L}_j(\mathbf{g}) \cap \mathbb{L}_{j'}(\mathbf{g}') \subset \{x \in \mathbb{R}^d : -a_{\mathbf{g}'}(j', j) \leq \langle x, y_{j'} - y_j \rangle \leq a_{\mathbf{g}}(j, j')\}.$$

Moreover, noting  $h = (h_1, \dots, h_M) = \mathbf{g} - \mathbf{g}'$ , we see that

$$|a_{\mathbf{g}'}(j', j) + a_{\mathbf{g}}(j, j')| \leq |h_{j'} - h_j|. \quad (17)$$

We have

$$\begin{aligned} \mu(\mathcal{A} &:= \{x \in \mathbb{R}^d, \nabla \mathbf{g}^c(x) \neq \nabla(\mathbf{g}')^c(x)\}) \\ &= \mu\left(\bigcup_{j < j'} \mathbb{L}_j(\mathbf{g}) \cap \mathbb{L}_{j'}(\mathbf{g}')\right) \\ &\leq \sum_{j < j'} \mu(\mathbb{L}_j(\mathbf{g}) \cap \mathbb{L}_{j'}(\mathbf{g}')) \\ &\leq \sum_{j < j'} \mu(\{x \in \mathbb{R}^d : -a_{\mathbf{g}'}(j', j) \leq \langle x, y_{j'} - y_j \rangle \leq a_{\mathbf{g}}(j, j')\}) . \end{aligned}$$

Under Assumption 1,  $\mu$  is a measure such that  $\text{Supp}(\mu) \subset B(0, R)$  and it admits a density  $d\mu$  bounded by  $d\mu_{\max}$ . Thus,

$$\begin{aligned} \mu(\mathcal{A}) &\leq d\mu_{\max} \sum_{j < j'} \lambda_{\mathbb{R}^d}(\{x \in B(0, R) : -a_{\mathbf{g}'}(j', j) \leq \langle x, y_{j'} - y_j \rangle \leq a_{\mathbf{g}}(j, j')\}) \\ &\leq d\mu_{\max} \sum_{j < j'} \lambda_{\mathbb{R}^d}\left(\left\{x \in B(0, R) : -\frac{a_{\mathbf{g}'}(j', j)}{\|y_{j'} - y_j\|_2} \leq \left\langle x, \frac{y_{j'} - y_j}{\|y_{j'} - y_j\|_2} \right\rangle \leq \frac{a_{\mathbf{g}}(j, j')}{\|y_{j'} - y_j\|_2} \right\}\right) \\ &\leq d\mu_{\max} \sum_{j < j'} \lambda_{\mathbb{R}^d}\left(\left\{x \in B(0, R) : -\frac{a_{\mathbf{g}'}(j', j)}{\|y_{j'} - y_j\|_2} \leq x_1 \leq \frac{a_{\mathbf{g}}(j, j')}{\|y_{j'} - y_j\|_2} \right\}\right), \end{aligned}$$



by the rotational invariance of the Lebesgue measure. Combining this remark with (17) yields

$$\mu(\mathcal{A}) \leq d\mu_{\max} R^{d-1} \sum_{j < j'} \frac{|h_{j'} - h_j|}{\|y_{j'} - y_j\|_2}.$$

Similarly, for the  $L^p$  norm of the map difference, we obtain

$$\begin{aligned} \|(\nabla \mathbf{g}^c(\cdot) - \nabla (\mathbf{g}')^c(\cdot))\|_q \|_{L^p(\mu)}^p &\leq \sum_{j < j'} \int_{\mathbb{L}_j(\mathbf{g}) \cap \mathbb{L}_{j'}(\mathbf{g}')} \|(\nabla \mathbf{g}^c(\cdot) - \nabla (\mathbf{g}')^c(\cdot))\|_q d\mu(x) \\ &\leq \sum_{j < j'} \|y_{j'} - y_j\|_q \mu(\mathbb{L}_j(\mathbf{g}) \cap \mathbb{L}_{j'}(\mathbf{g}')) \\ &\leq d\mu_{\max} R^{d-1} \sum_{j < j'} \frac{\|y_{j'} - y_j\|_q |h_{j'} - h_j|}{\|y_{j'} - y_j\|_2} \\ &\leq d\mu_{\max} M^{(2-q)+/2q} R^{d-1} 2M \|h\|_1. \end{aligned}$$

So, in particular, there exists a constant  $C_\Delta > 0$ , independent of the location of the points  $y_j$ , which grows at least linearly in  $M$  such that

$$\|(\nabla \mathbf{g}^c(\cdot) - \nabla (\mathbf{g}')^c(\cdot))\|_q \|_{L^p(\mu)}^p \leq C_\Delta \|\mathbf{g} - \mathbf{g}'\|_1 \leq C_\Delta \sqrt{M} \|\mathbf{g} - \mathbf{g}'\|.$$

Plugging in the convergence rate of  $\bar{\mathbf{g}}_t$  to  $\mathbf{g}^*$  concludes the proof.  $\square$

#### B.4 Proof of Corollary 1: OT cost estimation

*Proof.* For any vector  $\mathbf{g} \in \mathbb{R}^M$ , we recall the definition of  $\mathbb{L}(\mathbf{g}) = \bigcup_{j=1}^M \mathbb{L}_j(\mathbf{g})$  :

$$\text{for all } j \in \llbracket 1, M \rrbracket, \mathbb{L}_j(\mathbf{g}) := \left\{ x \in \mathbb{R}^d; \mathbf{g}^c(x) = \frac{1}{2} \|x - y_j\|_2^2 - g_j \right\}.$$

Note that  $\mathbb{L}(\mathbf{g})$  defines a partition of  $\mathbb{R}^d$  up to  $\mu$ -null sets, i.e.  $\mu(\mathbb{L}_i(\mathbf{g}) \cap \mathbb{L}_j(\mathbf{g})) = 0$  when  $i \neq j$ , and the convex sets  $\mathbb{L}_j(\mathbf{g})$  are called power or Laguerre cells. We define the set

$$\mathcal{K}^\delta := \{\mathbf{g} : \mathbb{R}^M \rightarrow \mathbb{R} \mid \forall i \in \llbracket 1, M \rrbracket, \mu(\mathbb{L}_i(\mathbf{g})) > \delta\}.$$

Using Theorem 4.1 in [32], under Assumption 1,  $H_0$  is uniformly  $C^{2,\alpha}$  on  $\mathcal{K}^\delta$ . That is, there exists a constant  $L$  such that  $H_0$  is  $L$ -smooth on  $\mathcal{K}^\delta$ . Note that the constant  $L$  depends on  $\mu_{\min}$ ,  $\delta$ ,  $R$ . We refer to [32], Remark 4.1 for more details.

By the first order condition, as soon as  $\delta \leq w_{\min}$ , we have  $\mathbf{g}^* \in \mathcal{K}^\delta$ . Indeed, at the optimum, we have for all  $i \in \llbracket 1, M \rrbracket$ ,  $\mu(\mathbb{L}_i(\mathbf{g}^*)) = w_i$ . We fix here  $\delta = \frac{1}{10} w_{\min}$ .

Thanks to the  $L$ -smoothness, for any  $\mathbf{g} \in \mathcal{K}^\delta$ , we have

$$|H_0(\mathbf{g}) - H_0(\mathbf{g}^*)| \leq \frac{L}{2} \|\mathbf{g} - \mathbf{g}^*\|^2.$$

Note that, for any  $\mathbf{g} \in \mathbb{R}^M$  and  $i \in \llbracket 1, M \rrbracket$ , the difference of measure of the Laguerre cells  $\mathbb{L}_i(\mathbf{g})$  and  $\mathbb{L}_i(\mathbf{g}^*)$  is at most linear with respect to  $\|\mathbf{g} - \mathbf{g}^*\|_\infty$ . We refer to Theorem 3 or Section 6.4.2 in [46] for more details.

Therefore, there exists a constant  $C_L$  such that, as soon as  $\|\mathbf{g} - \mathbf{g}^*\|^2 \leq C_L$ , we have that  $\mathbf{g} \in \mathcal{K}^\delta$ . This constant depends on  $\delta, \mu_{\max}$ ,  $R$  and  $d$  as in Theorem 3. Using Theorem 2,  $\mathbb{E}[\|\bar{\mathbf{g}}_t - \mathbf{g}^*\|^2] = \mathcal{O}(t^{-s})$  with  $s > 0$ . Then

$$\begin{aligned} \mathbb{E}[|H_0(\bar{\mathbf{g}}_t) - H_0(\mathbf{g}^*)|] &= \mathbb{E}[|H_0(\bar{\mathbf{g}}_t) - H_0(\mathbf{g}^*)| \mathbb{1}_{\bar{\mathbf{g}}_t \in \mathcal{K}^\delta}] + \mathbb{E}[|H_0(\bar{\mathbf{g}}_t) - H_0(\mathbf{g}^*)| \mathbb{1}_{\bar{\mathbf{g}}_t \notin \mathcal{K}^\delta}] \\ &\leq \frac{L}{2} \mathbb{E}[\|\bar{\mathbf{g}}_t - \mathbf{g}^*\|^2] + \max_{\mathbf{g} \in \mathcal{C}} |H_0(\mathbf{g}) - H_0(\mathbf{g}^*)| \mathbb{E}[\mathbb{1}_{\bar{\mathbf{g}}_t \notin \mathcal{K}^\delta}] \\ &\leq \frac{L}{2} \mathbb{E}[\|\bar{\mathbf{g}}_t - \mathbf{g}^*\|^2] + \max_{\mathbf{g} \in \mathcal{C}} |H_0(\mathbf{g}) - H_0(\mathbf{g}^*)| \mathbb{E}[\mathbb{1}_{\|\bar{\mathbf{g}}_t - \mathbf{g}^*\|^2 > C_L}] \\ &= \mathcal{O}(\mathbb{E}[\|\bar{\mathbf{g}}_t - \mathbf{g}^*\|^2]), \end{aligned}$$

where the Markov inequality of order 1 was used on  $\mathbb{E}[\mathbb{1}_{\|\bar{\mathbf{g}}_t - \mathbf{g}^*\|^2 > C_L}]$ .  $\square$

794 **B.5 Proof of Proposition 2: High probability being in  $B(\mathbf{g}_{\varepsilon_t}^*, \varepsilon_t)$ .**

795 *Proof.* The proof of this proposition relies heavily on the technical Lemma 4, which we state and  
796 prove immediately after this proof.

797 We start with a base case at  $\delta = u_0 = 0$ , which provides an initial convergence rate for  $\mathbb{E}[\Delta_t^p]$ . Then,  
798 by an inductive argument, we gradually increase  $u_n$  to improve this rate till the limit when  $n$  tends to  
799 infinity, namely  $\min\{b - a, a\}$ .

800 **Base case ( $u_0 = 0$ ).** Using Lemma 4, with  $\lambda_{c,t} = \rho_* \frac{1 - e^{-4C_\infty}}{4C_\infty} \varepsilon_t$  if  $c = 0$ , and  $\lambda_{c,t} = \rho_*(1 -$   
801  $e^{-1})\varepsilon_t t^c$  if  $c \in (0, a]$ , we have

$$\mathbb{E}[\Delta_{t+1}^p] \leq \mathbb{E}[\Delta_t^p] \left(1 - \gamma_{t+1} \lambda_{0,t} + C_{1,p} \gamma_{t+1}^2\right) + C_{2,p} \lambda_{c,t}^{-p+1} \gamma_{t+1}^{p+1}.$$

802 By applying Proposition 5 and Corollary 2, we obtain the following baseline convergence rate, for all  
803  $p > 0$ :

$$\mathbb{E}[\Delta_t^p] \lesssim \frac{\gamma_t^p}{\varepsilon_t^p}.$$

804 **Inductive step (improving the rate).** Suppose that for some  $u_n \in [0, \min\{b - a, a\})$ , we already  
805 have

$$\mathbb{E}[\Delta_t^p] \lesssim t^{-p(b-a+u_n)}.$$

806 Choose  $c < \frac{b-a+u_n}{2}$  and set  $d = b - a + u_n - 2c > 0$ , which is positive by construction. By  
807 Markov's inequality, we then get for all  $q > 0$

$$\mathbb{P}[\Delta_t \geq t^{-2c}] = \mathbb{P}[\Delta_t^q \geq t^{-2qc}] \lesssim t^{-q(b-a+u_n-2c)} = t^{-dq}.$$

808 We take  $q$  chosen large enough so that  $dq > p + 1$ .

809 Consequently, applying Lemma 4,

$$\mathbb{E}[\Delta_t^p] \leq \mathbb{E}[\Delta_t^p] \left(1 - \gamma_{t+1} \lambda_{c,t} + C_{1,p} \gamma_{t+1}^2\right) + C_{2,p} \lambda_{c,t}^{-p+1} \gamma_{t+1}^{p+1} + o(\gamma_{t+1}^{p+1}).$$

810 Therefore, if we pick any  $u_{n+1} \in (0, \frac{b-a+u_n}{2})$ , applying Proposition 5 and Corollary 2, we see that

$$\mathbb{E}[\Delta_t^p] \lesssim \frac{\gamma_t^p}{\varepsilon_t^p} t^{-cp} \lesssim t^{-pu_{n+1}}.$$

811 As soon as  $b - a > u_n$ , we have  $(b - a + u_n)/2 > u_n$  as a valid range upper range for  $u_{n+1}$ , so we  
812 can take  $u_{n+1} > u_n$  and strictly improve our convergence rate.

813 **Achievability for all  $\delta \in [0, \min\{b - a, a\})$ .** Finally, note that the sequence defined by  $u_0 = 0$   
814 and  $u_{n+1} = \frac{b-a+u_n}{2}$  converges to  $(b - a)$ , showing that every value  $\delta$  up to  $(b - a)$  can be reached  
815 through successive improvements. Since  $c = a$  is the upper bound in Lemma 4, we can continue the  
816 limit  $\min\{b - a, a\}$ , so for all  $\delta \in [0, \min\{b - a, a\})$ , we have

$$\mathbb{E}[\Delta_t^p] \lesssim \frac{\gamma_t^p t^\delta}{\varepsilon_t^p}.$$

817 Using Markov's inequality concludes the proof.

818 □

819 **Lemma 4.** For any  $a, b > 0$ , such that  $1 + a + a\alpha > 2b$ , there exists constants  $C_{1,p}, C_{2,p}$ , only  
820 depending on  $\gamma_1$  and  $p$ , such that defining

$$\lambda_{c,t} = \begin{cases} \rho_* \frac{1 - e^{-4C_\infty}}{4C_\infty} \varepsilon_t, & \text{if } c = 0, \\ \rho_*(1 - e^{-1}) \varepsilon_t t^c, & \text{if } c \in (0, a]. \end{cases}$$

821 we have for any  $c \in [0, a]$

$$\mathbb{E}[\Delta_{t+1}^p] \leq \mathbb{E}[\Delta_t^p] \left(1 - \gamma_{t+1} \lambda_{c,t} + C_{1,p} \gamma_{t+1}^2\right) + \gamma_{t+1} D_C^{2p} \mathbb{P}(\Delta_t \geq t^{-2c}) \mathbf{1}_{c \neq 0} + C_{2,p} \lambda_{c,t}^{-p+1} \gamma_{t+1}^{p+1}. \quad (18)$$

822 *Proof.* Let us fix  $c \in [0, a]$ . Starting from equation (13), raising to the power  $p$  gives

$$\Delta_{t+1}^p \leq (\Delta_t - 2\gamma_{t+1} \langle \nabla_{\mathbf{g}} h_{\varepsilon_t}(\mathbf{g}_t, X_{t+1}), \mathbf{g}_t - \mathbf{g}_t^* \rangle + 5\gamma_{t+1}^2)^p. \quad (19)$$

823 We note  $\binom{p}{i,j,k} = \frac{p!}{i!j!k!}$  and apply the trinomial expansion to obtain

$$\begin{aligned} \Delta_{t+1}^p &\leq \sum_{\substack{i,j,k \\ i+j+k=p}} \binom{p}{i,j,k} \Delta_t^i (-2\gamma_{t+1} \langle \nabla_{\mathbf{g}} h_{\varepsilon_t}(\mathbf{g}_t, X_{t+1}), \mathbf{g}_t - \mathbf{g}_t^* \rangle)^j 5^k \gamma_{t+1}^{2k} \\ &\leq \Delta_t^p - 2p\Delta_t^{p-1} \gamma_{t+1} \langle \nabla_{\mathbf{g}} h_{\varepsilon_t}(\mathbf{g}_t, X_{t+1}), \mathbf{g}_t - \mathbf{g}_t^* \rangle \\ &\quad - 2p(p-1)\Delta_t^{p-2} \gamma_{t+1}^2 \langle \nabla_{\mathbf{g}} h_{\varepsilon_t}(\mathbf{g}_t, X_{t+1}), \mathbf{g}_t - \mathbf{g}_t^* \rangle^2 5\gamma_{t+1}^2 \\ &\quad + \sum_{\substack{i,j,k \\ i+j+k=p \\ (i,j,k) \notin \{(p,0,0), (p-1,1,0), (p-2,1,1)\}}} \binom{p}{i,j,k} \Delta_t^i (-2\gamma_{t+1} \langle \nabla_{\mathbf{g}} h_{\varepsilon_t}(\mathbf{g}_t, X_{t+1}), \mathbf{g}_t - \mathbf{g}_t^* \rangle)^j 5^k \gamma_{t+1}^{2k}. \end{aligned}$$

824 We divide the set  $\mathcal{S} := \{(i, j, k) \in \mathbb{N}^3, i + j + k = p, (i, j, k) \notin (p, 0, 0), (p-1, 1, 0), (p-2, 1, 1)\}$   
825 into the following partition

$$\begin{aligned} \mathcal{P}_a &:= (i, j, k) \in \{(p-2, 2, 0), (p-3, 3, 0), (p-1, 0, 1), (0, p, 0)\}, \\ \mathcal{P}_b &:= (\mathcal{S} \setminus \mathcal{P}_a) \cap \{i = 0\}, \\ \mathcal{P}_c &:= (\mathcal{S} \setminus \mathcal{P}_a) \cap \{i \neq 0\} \cap \{j \geq 4\} \cap \{k = 0\}, \\ \mathcal{P}_d &:= (\mathcal{S} \setminus \mathcal{P}_a) \cap \{i \neq 0\} \cap \{0 < j < 4\} \cap \{k \neq 0\}, \\ \mathcal{P}_e &:= (\mathcal{S} \setminus \mathcal{P}_a) \cap \{i \neq 0\} \cap \{j = 0\} \cap \{k \neq 0\}. \end{aligned}$$

826 In what follows, the constants  $C_k$  may depend on the constant  $\gamma_1$  from the learning rate  $\gamma_t = \gamma_1/t^b$ ,  
827 since we will often use the crude bound  $\gamma_t^{p+1+k} \leq \gamma_1^k \gamma_t^{p+1}$  for  $k \in \mathbb{N}$ . Note, however, that  $\lambda_{c,t} \leq 1$   
828 for all  $t$ , and therefore  $\lambda_{c,t}^{-q+k} \leq \lambda_{c,t}^{-q}$  for all  $q, k \in \mathbb{N}$ , so the constants  $C_k$  will not depend on  $\lambda_{c,t}$ .

829 We also introduce, for all  $p$ , the constant

$$\Gamma_p = \frac{3p+1}{2p-1}.$$

830 **Case where**  $(i, j, k) \in \mathcal{P}_a$ .

831 If  $(i, j, k) = (p-2, 2, 0)$ :

$$\begin{aligned} &\binom{p}{p-2, 2, 0} \Delta_t^{p-2} (-2\gamma_{t+1} \langle \nabla_{\mathbf{g}} h_{\varepsilon_t}(\mathbf{g}_t, X_{t+1}), \mathbf{g}_t - \mathbf{g}_t^* \rangle)^2 \\ &\leq 8p(p-1) \Delta_t^{p-1} \gamma_{t+1}^2 \quad \text{by Cauchy-Schwarz} \\ &\leq 8p(p-1) \left( \Delta_t^p \frac{p-1}{p} c_1^{p/(p-1)} + \gamma_{t+1}^p \frac{1}{p c_1^p} \right) \gamma_{t+1} \quad \text{by Young: } q = \frac{p}{p-1}, q' = p, c_1 > 0 \\ &\leq p \Delta_t^p \frac{\gamma_{t+1} \lambda_{c,t}}{\Gamma_p} + \gamma_{t+1}^{p+1} \frac{1}{p} \left( \frac{8\Gamma_p(p-1)}{\lambda_{c,t}} \right)^{p-1} \quad \text{taking } c_1 = \left( \frac{\lambda_{c,t}}{8\Gamma_p(p-1)} \right)^{(p-1)/p} \\ &\leq p \Delta_t^p \frac{\gamma_{t+1} \lambda_{c,t}}{\Gamma_p} + C_1 \lambda_{c,t}^{-p+1} \gamma_{t+1}^{p+1} \quad \text{defining } C_1 \text{ readily.} \end{aligned}$$

832 If  $(i, j, k) = (p-3, 3, 0)$ :

$$\begin{aligned}
& \binom{p}{p-3, 3, 0} \Delta_t^{p-3} (-2\gamma_{t+1} \langle \nabla_{\mathbf{g}} h_{\varepsilon_t}(\mathbf{g}_t, X_{t+1}), \mathbf{g}_t - \mathbf{g}_t^* \rangle)^3 \\
& \leq 4^3 \Delta_t^{p-\frac{3}{2}} \gamma_{t+1}^3 \quad \text{by Cauchy-Schwarz} \\
& \leq 64 \left( \Delta_t^p \frac{p - \frac{3}{2} \binom{p}{p-3}^{2p/3}}{p} c_2^{p/(p-\frac{3}{2})} + \gamma_{t+1}^{4p/3} \frac{3}{2pc_2^{2p/3}} \right) \gamma_{t+1} \\
& \quad \text{by Young: } q = \frac{p}{p-3/2}, q' = \frac{2p}{3} \\
& \leq p \Delta_t^p \frac{\gamma_{t+1} \lambda_{c,t}}{\Gamma_p} + \gamma_{t+1}^{\frac{4}{3}p+1} \frac{3}{2p} \left( \frac{32\Gamma_p(p-1)(p-2) \binom{p}{p-3}}{3\lambda_{c,t}} \right)^{\frac{2p-3}{3}} \\
& \quad \text{taking } c_2 = \left( \frac{3\lambda_{c,t}}{32\Gamma_p(p-1)(p-2)} \right)^{\frac{p-\frac{3}{2}}{p}} \\
& \leq p \Delta_t^p \frac{\gamma_{t+1} \lambda_{c,t}}{\Gamma_p} + C_2 \lambda_{c,t}^{-p+1} \gamma_{t+1}^{p+1} \quad \text{since } \frac{4}{3}p+1 \geq p+2 \text{ and } \frac{2p-3}{3} \leq p-1.
\end{aligned}$$

833 If  $(i, j, k) = (p-1, 0, 1)$ :

$$\begin{aligned}
& \binom{p}{p-1, 0, 1} \Delta_t^{p-1} \gamma_{t+1}^2 \leq p \left( \frac{p-1}{p} c_3^{\frac{p-1}{p}} \Delta_t^p + \frac{5^p}{pc_3^p} \gamma_{t+1}^p \right) \gamma_{t+1} \quad \text{by Young: } q = \frac{p}{p-1}, q' = p \\
& \leq p \Delta_t^p \frac{\gamma_{t+1} \lambda_{c,t}}{\Gamma_p} + \left( \frac{5^p \Gamma_p}{\lambda_{c,t}} \right)^p \gamma_{t+1}^{p+1} \quad \text{taking } c_3 = \left( \frac{\lambda_{c,t}}{\Gamma_p} \right)^{\frac{p-1}{p}} \\
& \leq p \Delta_t^p \frac{\gamma_{t+1} \lambda_{c,t}}{\Gamma_p} + C_3 \lambda_{c,t}^{-p+1} \gamma_{t+1}^{p+1} \quad \text{defining } C_3 \text{ readily.}
\end{aligned}$$

834 If  $(i, j, k) = (0, p, 0)$ :

$$\begin{aligned}
& \binom{p}{0, p, 0} (-2\gamma_{t+1} \langle \nabla_{\mathbf{g}} h_{\varepsilon_t}(\mathbf{g}_t, X_{t+1}), \mathbf{g}_t - \mathbf{g}_t^* \rangle)^p \\
& \leq 4^p \left( \frac{c_4^2}{2} \Delta_t^p + \frac{1}{2c_4^2} \gamma_{t+1}^{2p-2} \right) \gamma_{t+1} \quad \text{Cauchy-Schwarz and Young : } q = q' = 2 \\
& \leq \Delta_t^p \frac{\gamma_{t+1} \lambda_{c,t}}{\Gamma_p} + \frac{1}{2} \left( \frac{4^{2p} \Gamma_p}{4\lambda_{c,t}} \right) \gamma_{t+1}^{2p-1} \quad \text{taking } c_4 = \left( \frac{2\lambda_{c,t}}{4^p \Gamma_p} \right)^{\frac{1}{2}} \\
& \leq \Delta_t^p \frac{\gamma_{t+1} \lambda_{c,t}}{\Gamma_p} + C_4 \lambda_{c,t}^{-1} \gamma_{t+1}^{p+1} \quad \text{since } 2p-1 \geq p+1, \text{ and defining } C_4 \text{ readily.}
\end{aligned}$$

835 **Case where**  $(i, j, k) \in \mathcal{P}_b$ .

836 We have  $j+k=p$  such that  $j+2k \geq p+1$  since  $k \neq 0$ . Using the bound  $\|\mathbf{g}_t - \mathbf{g}_{\varepsilon_t}^*\| \leq D_C$ , we  
837 obtain:

$$\begin{aligned}
& \sum_{(i,j,k) \in \mathcal{P}_b} \binom{p}{i, j, k} (-2\gamma_{t+1} \langle \nabla_{\mathbf{g}} h_{\varepsilon_t}(\mathbf{g}_t, X_{t+1}), \mathbf{g}_t - \mathbf{g}_t^* \rangle)^j 5^k \gamma_{t+1}^{2k} \\
& \leq \sum_{(i,j,k) \in \mathcal{P}_b} \binom{p}{i, j, k} (4D)^j 5^k \gamma_{t+1}^{j+2k} \\
& \leq C_5 \gamma_{t+1}^{p+1} \quad \text{defining } C_5 \text{ readily.}
\end{aligned}$$

838 **Case where**  $(i, j, k) \in \mathcal{P}_c$ .

$$\begin{aligned}
& \sum_{(i,j,k) \in \mathcal{P}_c} \binom{p}{i,j} \Delta_t^i (-2\gamma_{t+1} \langle \nabla_{\mathbf{g}} h_{\varepsilon_t}(\mathbf{g}_t, X_{t+1}), \mathbf{g}_t - \mathbf{g}_t^* \rangle)^j && \text{by Cauchy-Schwarz} \\
& \leq \sum_{(i,j,k) \in \mathcal{P}_c} \binom{p}{i,j} \Delta_t^{i+j/2} 4^j \gamma_{t+1}^{j-2} \gamma_{t+1}^2 && \text{by Young: } q = \frac{p}{i+j/2}, q' = \frac{2p}{j} \\
& \leq \sum_{(i,j,k) \in \mathcal{P}_c} \binom{p}{i,j} \left( \frac{i+j/2}{p} \Delta_t^p + \frac{j}{2p} \gamma_{t+1}^{2p(j-2)/j} \right) \gamma_{t+1}^2 \\
& \leq \sum_{(i,j,k) \in \mathcal{P}_c} \binom{p}{i,j} 4^j \left( \Delta_t^p \gamma_{t+1}^2 + \frac{1}{2} \gamma_{t+1}^{p+1} \right) && j \geq 4 \text{ so: } \frac{2p(j-2)}{j} + 2 \geq p+1 \\
& \leq 8^p \Delta_t^p \gamma_{t+1}^2 + 8^p \gamma_{t+1}^{p+1}.
\end{aligned}$$

839 **Case where**  $(i, j, k) \in \mathcal{P}_d$ .

$$\begin{aligned}
& \sum_{(i,j,k) \in \mathcal{P}_d} \binom{p}{i,j} \Delta_t^i (-2\gamma_{t+1} \langle \nabla_{\mathbf{g}} h_{\varepsilon_t}(\mathbf{g}_t, X_{t+1}), \mathbf{g}_t - \mathbf{g}_t^* \rangle)^j 5^k \gamma_{t+1}^{2k} \\
& \leq \sum_{(i,j,k) \in \mathcal{P}_d} \binom{p}{i,j,k} 5^k \Delta_t^{i+j/2} 4^j \gamma_{t+1}^{j+2k} && \text{by Cauchy-Schwarz} \\
& \leq \sum_{(i,j,k) \in \mathcal{P}_d} \binom{p}{i,j,k} 4^j \left( c_6^q \frac{i+j/2}{p} \Delta_t^p + c_6^{-q'} \frac{j C_\gamma^{2p}}{2p} \gamma_{t+1}^{2p} \right) \\
& \text{by Young: } q = \frac{p}{i+j/2}, q' = \frac{2p}{j+2k}.
\end{aligned}$$

840 Taking  $c_6 = \gamma_t^{2/q}$ , it comes  $c_6^{-q'} = \gamma_t^{-2q'/q} = \gamma_t^{-2/(q-1)}$ . Since we are only considering cases with  
841  $i, j, k \geq 1$  (which forces  $p \geq 3$ ) and we are excluding the particular case  $(i, j, k) = (p-2, 1, 1)$ , one  
842 can show that the parameter  $q = \frac{2p}{2p-2i-j} = \frac{2p}{2k+j}$  satisfies

$$\begin{aligned}
\frac{2p}{2p-4} &\leq q \leq \frac{2p}{3} \\
\frac{4}{2p-4} &\leq q-1 \leq \frac{2p-3}{3}.
\end{aligned}$$

843 Thus, since  $\frac{2}{q-1} \leq p-2$ , it follows that

$$2p - \frac{2}{q-1} \geq 2p - (p-2) = p+2 \geq p+1.$$

844 Therefore, using the crude bound  $\sum_{(i,j,k) \in \mathcal{P}_d} \binom{p}{i,j,k} \leq 3^p$  and defining a constant  $C_6$  readily, we  
845 obtain

$$\sum_{(i,j,k) \in \mathcal{P}_d} \binom{p}{i,j} \Delta_t^i (-2\gamma_{t+1} \langle \nabla_{\mathbf{g}} h_{\varepsilon_t}(\mathbf{g}_t, X_{t+1}), \mathbf{g}_t - \mathbf{g}_t^* \rangle)^j 5^k \gamma_{t+1}^{2k} \leq 3^p \gamma_{t+1}^2 \Delta_t^p + C_6 \gamma_{t+1}^{p+1}.$$

846 **Case where**  $(i, j, k) \in \mathcal{P}_e$ .

847 Since  $j = 0, i+k = p$ , and  $(p-1, 0, 1) \in \mathcal{P}_e$ , we have  $k \geq 2$ . We use Young's inequality with  
848  $q = \frac{p}{i}, q' = \frac{p}{k}$  to obtain

$$\begin{aligned}
\sum_{(i,j,k) \in \mathcal{P}_e} \binom{p}{i,k} \Delta_t^i \gamma_{t+1}^{2k} 5^k &\leq \sum_{(i,j,k) \in \mathcal{P}_e} \binom{p}{i,k} \left( \frac{i}{p} \Delta_t^p + \frac{k}{p} (\gamma_{t+1} 5^{\frac{1}{2}})^{\frac{p(2k-2)}{k}} \right) \gamma_{t+1}^2 \\
&\leq \sum_{(i,j,k) \in \mathcal{P}_e} \binom{p}{i,k} \left( \Delta_t^p \gamma_{t+1}^2 + 5^{p-\frac{p}{k}} \gamma_{t+1}^{2p-\frac{2p}{k}+2} \right) \\
&\leq 2^p \Delta_t^p \gamma_{t+1}^2 + C_7 \gamma_{t+1}^{p+1} && \text{since } 2p - \frac{2p}{k} + 2 \geq p+2.
\end{aligned}$$

849 **Summing up the inequalities**, we obtain

$$\begin{aligned} \Delta_{t+1}^p &\leq \Delta_t^p \\ &\quad - 2p\Delta_t^{p-1}\gamma_{t+1} \langle \nabla_{\mathbf{g}} h_{\varepsilon_t}(\mathbf{g}_t, X_{t+1}), \mathbf{g}_t - \mathbf{g}_t^* \rangle \\ &\quad - 2p(p-1)\Delta_t^{p-1}\gamma_{t+1} \langle \nabla_{\mathbf{g}} h_{\varepsilon_t}(\mathbf{g}_t, X_{t+1}), \mathbf{g}_t - \mathbf{g}_t^* \rangle 5\gamma_{t+1}^2 \\ &\quad + \Delta_t^p \lambda_{c,t} \frac{3p+1}{\Gamma_p} \gamma_{t+1} \\ &\quad + \Delta_t^p \gamma_{t+1}^2 (8^p + 3^p + 2^p) \\ &\quad + \gamma_{t+1}^{p+1} \left( (C_1 + C_2 + C_3) \lambda_{c,t}^{-p+1} + C_4 \lambda_{c,t}^{-1} + C_5 + 8^p + C_6 + C_7 \right). \end{aligned}$$

850 By convexity of  $H_{\varepsilon_t}$ , taking the conditional expectation gives

$$\mathbb{E} \left[ -2p(p-1)\Delta_t^{p-1}\gamma_{t+1} \langle \nabla_{\mathbf{g}} h_{\varepsilon_t}(\mathbf{g}_t, X_{t+1}), \mathbf{g}_t - \mathbf{g}_t^* \rangle 5\gamma_{t+1}^2 \mid \mathcal{F}_t \right] \leq 0,$$

851 Applying Lemma 2, recalling that  $\lambda_{c,t} = \rho_* \frac{1-e^{-1}}{2\sqrt{2}c_\infty} \varepsilon_t$  if  $c = 0$ , and  $\lambda_{c,t} = \rho_* \frac{1-e^{-1}}{\sqrt{2}} \varepsilon_t t^c$  if  
852  $c \in (0, a]$ , we have

$$\langle \nabla H_t(\mathbf{g}), \mathbf{g} - \mathbf{g}_t^* \rangle \geq \rho_* \frac{\varepsilon_t}{\sqrt{2}\|\mathbf{g} - \mathbf{g}_t^*\|_\infty} \Delta_t \geq \begin{cases} \lambda_{c,t} \Delta_t & \text{if } c = 0 \\ \lambda_{c,t} \Delta_t \mathbf{1}_{\Delta_t \leq t^{-2c}} & \text{if } c \in (0, a] \end{cases}. \quad (20)$$

853 Therefore,

$$\begin{aligned} &\mathbb{E} \left[ -2p\Delta_t^{p-1}\gamma_{t+1} \langle \nabla_{\mathbf{g}} h_{\varepsilon_t}(\mathbf{g}_t, X_{t+1}), \mathbf{g}_t - \mathbf{g}_t^* \rangle \mid \mathcal{F}_t \right] \\ &\quad = -2p\Delta_t^{p-1}\gamma_{t+1} \mathbb{E} [\langle \nabla_{\mathbf{g}} h_{\varepsilon_t}(\mathbf{g}_t, X_{t+1}), \mathbf{g}_t - \mathbf{g}_t^* \rangle \mid \mathcal{F}_t] \\ &\quad = -2p\Delta_t^{p-1}\gamma_{t+1} \langle \nabla H_{\varepsilon_t}(\mathbf{g}_t), \mathbf{g}_t - \mathbf{g}_t^* \rangle \quad \text{by (20)} \\ &\quad \leq -2p\lambda_{c,t}\gamma_{t+1}\Delta_t^p + \gamma_{t+1}D_C^{2p} \mathbf{1}_{\Delta_t \geq t^{-2c}} \mathbf{1}_{c \neq 0} \quad \text{using that } \Delta_t^p \leq D_C^{2p}. \end{aligned}$$

854 We now just have to sum up the inequalities. Fixing  $\Gamma_p = \frac{3p+1}{2p-1}$  such that  $-2p + \frac{3p+1}{\Gamma_p} = -1$ ,

855  $C_{1,p} = 8^p + 3^p + 2^p$ ,  $C_{2,p} = 8^p + \sum_{k=1}^7 C_k$ , and taking the expectation, we have the desired form

$$\mathbb{E}[\Delta_{t+1}^p] \leq \mathbb{E}[\Delta_t^p] (1 - \gamma_{t+1}\lambda_{c,t} + C_{1,p}\gamma_{t+1}^2) + \gamma_{t+1}D_C^{2p} \mathbb{E}[\mathbf{1}_{\Delta_t \geq t^{-2c}}] \mathbf{1}_{c \neq 0} + C_{2,p}\lambda_{c,t}^{-p+1}\gamma_{t+1}^{p+1}.$$

856 □

## 857 **B.6 Proof of Lemma 1: Projection step**

858 *Proof.* According to [40], any optimal pair of functions  $(f_\varepsilon, g_\varepsilon)$  solving the dual formulation of  
859 entropic OT with regularization  $\varepsilon \geq 0$  satisfies the Schrödinger equations. That is, we can take for  
860 all  $y \in \mathbb{R}^d$ ,  $g_\varepsilon(y) = f_\varepsilon^{c,\varepsilon}(y)$ . Moreover,  $\frac{1}{2}\|x - y\|^2$  is  $R$ -Lipschitz on  $B(0, R)$ . Therefore, since by  
861 Assumption 1, we have  $\text{Supp}(\mu) \subset B(0, R)$  and  $\text{Supp}(\nu) \subset B(0, R)$ , we can exploit the Lipschitz  
862 property of our cost function on  $B(0, R)$ . Using that the  $(c, \varepsilon)$ -transform has the same modulus of  
863 continuity as  $c$  (see Lemma 3.1 in [40]), we get, for all  $y, y' \in \mathbb{R}^d$ :

$$|f_\varepsilon^{c,\varepsilon}(y) - f_\varepsilon^{c,\varepsilon}(y')| \leq R\|y - y'\|.$$

864 That is, coming back to the function  $g$ , we have for all  $j, j' \in \llbracket 1, M \rrbracket$ :

$$|g_\varepsilon(y_j) - g_\varepsilon(y_{j'})| \leq R\|y_j - y_{j'}\|.$$

865 By writing back our dual potential as a vector, that is  $\mathbf{g}^* = (g_1^*, \dots, g_M^*)$ , where for all  $j \in$   
866  $\llbracket 1, M \rrbracket$ ,  $g_j^* = g_\varepsilon(y_j)$ , we have

$$|g_j^* - g_{j'}^*| \leq R\|y_j - y_{j'}\|.$$

867 Moreover, if  $\mathbf{g}^*$  optimizes the semi-dual  $H_\varepsilon$ , then for any  $\beta \in \mathbb{R}$ , the vector  $\mathbf{g}^* + \beta \mathbf{1}_M$  optimizes  $H_\varepsilon$ .  
868 In particular,  $\mathbf{g}^* - g_\varepsilon(y_1) \mathbf{1}_M$ , which we rename  $\mathbf{g}^*$ , optimizes the semi-dual, with  $g_1^* = 0$ . Hence,  
869 for all  $j \in 1, \dots, M$

$$|g_{y_1}^* - g_{y_j}^*| = |g_{y_j}^*| \leq R\|y_1 - y_j\|.$$

870 That is, there exists an optimizer in the desired closed convex set. □

**Remark:** Note that for other costs such as  $c(x, y) = \|x - y\|$  which defines the 1-Wasserstein distance, this projection set can be more relevant. Indeed, in this case, the cost is 1-Lipschitz and the projection set depends only on the target measure  $\nu$  and no assumption of bounded cost is needed. In this case, the practitioner could choose the index  $k$  such that  $g_k = 0$ , minimizing for instance the Euclidean diameter of the corresponding set.

## B.7 Proof of Lemma 2: Global and local RSC condition of $H_\varepsilon$

*Proof.* For any  $\mathbf{g} \in \mathcal{C}$  and  $s \in [0, 1]$ , note  $\mathbf{g}_s = \mathbf{g}_\varepsilon^* + s(\mathbf{g} - \mathbf{g}_\varepsilon^*)$ , where  $\mathbf{g}_\varepsilon^*$  is the minimizer of  $H_\varepsilon$  satisfying  $\sum_{i=1}^M g_i = \sum_{i=1}^M g_{\varepsilon,i}^*$  and define  $\varphi$  by

$$\varphi : s \in [0, 1] \mapsto H_\varepsilon(\mathbf{g}_s).$$

Applying Lemma 5, whose proof is postponed until after this one, we have that

$$|\varphi'''(s)| \leq \frac{1}{\varepsilon} \varphi''(s) \max_{1 \leq j \leq M} |g_j - g_j^* - m(x, \mathbf{g}_s)|, \quad (21)$$

where for all  $x \in \mathbb{R}^d$  :  $m(x, \mathbf{g}_s) := \sum_{j=1}^M \chi_j^\varepsilon(x, \mathbf{g}_s)(\mathbf{g}_s - \mathbf{g}_\varepsilon^*)$ .

Using Hölder's inequality with the Hölder conjugates  $p = 1, q = +\infty$  for  $\delta_0$  and Cauchy-Schwarz inequality as in [5] for  $\delta_1$ , we obtain

$$\frac{1}{\varepsilon} \max_{1 \leq j \leq M} |g_j - g_{\varepsilon,j}^* - m(x, \mathbf{g}_s)| \leq \begin{cases} \frac{2}{\varepsilon} \|\mathbf{g} - \mathbf{g}_\varepsilon^*\|_\infty =: \delta_0, \\ \frac{\sqrt{2}}{\varepsilon} \|\mathbf{g} - \mathbf{g}_\varepsilon^*\| =: \delta_1. \end{cases} \quad (22)$$

Use  $\delta = \delta_0$  or  $\delta_1 = 1$ . Since  $\sum_{i=1}^M g_i = \sum_{i=1}^M g_{\varepsilon,i}^*$ ,  $\varphi$  is strictly convex, and therefore, we can divide by  $\varphi''(s)$  to obtain for  $s \in [0, 1]$

$$\frac{\varphi'''(s)}{\varphi''(s)} \geq -\delta.$$

Integrating between 0 and  $S$  and using that  $\int_0^S \frac{\varphi'''(s)}{\varphi''(s)} ds = \ln |\varphi''(S)| - \ln |\varphi''(0)|$  gives

$$\varphi''(s) \geq \exp(-\delta S) \varphi''(0). \quad (23)$$

Since  $\varphi''(s) = (\mathbf{g} - \mathbf{g}_\varepsilon^*)^\top \nabla^2 H_\varepsilon(\mathbf{g}_s) (\mathbf{g} - \mathbf{g}_\varepsilon^*)$ , recalling that  $\rho^*$  is the second smallest eigenvalue of  $\nabla^2 H_\varepsilon(\mathbf{g}_\varepsilon^*)$  gives the upper bound

$$\varphi''(0) \geq \rho^* \|\mathbf{g} - \mathbf{g}_\varepsilon^*\|^2.$$

Then, since  $\varphi'(s) = \langle \nabla H_\varepsilon(\mathbf{g}_s), \mathbf{g} - \mathbf{g}_\varepsilon^* \rangle$ , an integration of (23) between 0 and 1 gives

$$\langle \nabla H_\varepsilon(\mathbf{g}), \mathbf{g} - \mathbf{g}_\varepsilon^* \rangle_v \geq \rho^* \frac{1}{\delta} (1 - \exp(-\delta)) \|\mathbf{g} - \mathbf{g}_\varepsilon^*\|^2. \quad (24)$$

Note that the function  $\delta \in (0, \infty) \mapsto \frac{1}{\delta} (1 - \exp(-\delta))$  is strictly decreasing and upper bounded by 1.

If  $\varepsilon = 1$ , take  $\delta = \delta_0 = 2\|\mathbf{g} - \mathbf{g}_\varepsilon\|_\infty$  and use the fact that  $\|\mathbf{g} - \mathbf{g}_\varepsilon\|_\infty \leq 2C_\infty$  to obtain

$$\langle \nabla H_1(\mathbf{g}), \mathbf{g} - \mathbf{g}_1^* \rangle \geq \rho^* \frac{1}{4C_\infty} (1 - e^{-4C_\infty}) \|\mathbf{g} - \mathbf{g}_\varepsilon^*\|^2.$$

In the same way, for  $\varepsilon < 1$  and  $\|\mathbf{g} - \mathbf{g}_\varepsilon^*\| \leq \frac{\varepsilon}{\sqrt{2}}$ , taking  $\delta = \delta_1 = \sqrt{2}\|\mathbf{g} - \mathbf{g}_\varepsilon^*\| \leq 1$  we obtain

$$\langle \nabla H_\varepsilon(\mathbf{g}), \mathbf{g} - \mathbf{g}_\varepsilon^* \rangle_v \geq \rho^* (1 - e^{-1}) \|\mathbf{g} - \mathbf{g}_\varepsilon^*\|^2,$$

which concludes the proof. □

**Lemma 5** (Helping Lemma for the RSC condition of  $H_\varepsilon$ ). *For any  $\mathbf{g} \in \mathcal{C}$  and  $t \in [0, 1]$ , define  $\mathbf{g}_s = \mathbf{g}_\varepsilon^* + s(\mathbf{g} - \mathbf{g}_\varepsilon^*)$ , where  $\mathbf{g}_\varepsilon^*$  is the minimizer of  $H_\varepsilon$  satisfying  $\sum_{i=1}^M g_i = \sum_{i=1}^M g_{\varepsilon,i}^*$ . The function  $\varphi$ , defined by*

$$\varphi : s \in [0, 1] \mapsto H_\varepsilon(\mathbf{g}_s),$$

897 satisfies

$$|\varphi'''(s)| \leq \frac{1}{\varepsilon} \varphi''(s) \max_{1 \leq j \leq M} |g_j - g_j^* - m(x, \mathbf{g}_s)| .$$

898 Where  $m(x, \mathbf{g}_s) = \sum_{i=1}^M \chi_i^\varepsilon(x, \mathbf{g}_s)(g_i - g_{\varepsilon,i}^*)$ .

899 *Proof.* The proof is an adaptation of the proof of Lemma A.2 in [5]. For completeness, we recall  
900 all the steps of their proof that are needed for our results. Note that their recent erratum regarding  
901 Lemma A.1 has no impact on Lemma A.2.

902 For any  $\mathbf{g} \in \mathbb{R}^M$  and  $s \in [0, 1]$ , define  $\mathbf{g}_s = \mathbf{g}_\varepsilon^* + s(\mathbf{g} - \mathbf{g}_\varepsilon^*)$ , where  $\mathbf{g}_\varepsilon^*$  is the minimizer of  $H_\varepsilon$   
903 satisfying  $\sum_{i=1}^M g_i = \sum_{i=1}^M g_{\varepsilon,i}^*$ . We also define the function  $\varphi$  by

$$\varphi : s \in [0, 1] \mapsto H_\varepsilon(\mathbf{g}_s) .$$

904 Its first to third-order derivatives are given by

$$\begin{aligned} \varphi'(s) &= \langle \nabla H_\varepsilon(\mathbf{g}_s), \mathbf{g} - \mathbf{g}_\varepsilon^* \rangle , \\ \varphi''(s) &= (\mathbf{g} - \mathbf{g}_\varepsilon^*)^\top \nabla^2 H_\varepsilon(\mathbf{g}_s) (\mathbf{g} - \mathbf{g}_\varepsilon^*) , \\ \varphi'''(s) &= \sum_{i,j,k=1}^M \frac{\partial^3 H_\varepsilon(\mathbf{g}_s)}{\partial g_i \partial g_j \partial g_k} (\mathbf{g} - \mathbf{g}_\varepsilon^*)_i (\mathbf{g} - \mathbf{g}_\varepsilon^*)_j (\mathbf{g} - \mathbf{g}_\varepsilon^*)_k . \end{aligned}$$

905 Since for all  $\mathbf{g} \in \mathbb{R}^M$ ,  $\nabla H_\varepsilon(\mathbf{g}) = -\mathbb{E}_{X \sim \mu} [\chi^\varepsilon(X, \mathbf{g})] + \mathbf{w}$ ,

$$\begin{aligned} \varphi'(s) &= \langle -\mathbb{E}_{X \sim \mu} [\chi^\varepsilon(X, \mathbf{g}_s)] + \mathbf{w}, \mathbf{g} - \mathbf{g}_\varepsilon^* \rangle \\ &= -\mathbb{E}_{X \sim \mu} [m(X, \mathbf{g}_s)] + \langle \mathbf{w}, \mathbf{g} - \mathbf{g}_\varepsilon^* \rangle , \end{aligned}$$

906 defining for all  $x \in \mathbb{R}^d$ ,  $m(x, \mathbf{g}_s) = \sum_{i=1}^M \chi_i^\varepsilon(x, \mathbf{g}_s)(g_i - g_{\varepsilon,i}^*)$ .

907 Using that  $\nabla_{\mathbf{g}} \chi^\varepsilon(x, \mathbf{g}) = \frac{1}{\varepsilon} (\text{diag}(\chi^\varepsilon(x, \mathbf{g})) - \chi^\varepsilon(x, \mathbf{g}) \chi^\varepsilon(x, \mathbf{g})^\top)$ , we have

$$\frac{d}{ds} \chi^\varepsilon(X, \mathbf{g}_s) = \frac{1}{\varepsilon} (\text{diag}(\chi^\varepsilon(X, \mathbf{g}_s)) - \chi^\varepsilon(X, \mathbf{g}_s) \chi^\varepsilon(X, \mathbf{g}_s)^\top) (\mathbf{g} - \mathbf{g}_\varepsilon^*) .$$

908 Therefore, using the expression of  $m$  yields to

$$\begin{aligned} \varphi''(s) &= -\frac{1}{\varepsilon} \mathbb{E}_{X \sim \mu} [(\mathbf{g} - \mathbf{g}_\varepsilon^*)^\top \text{diag}(\chi_i^\varepsilon(X, \mathbf{g}_s)) (\mathbf{g} - \mathbf{g}_\varepsilon^*) - m(X, \mathbf{g}_s)^2] \\ &= -\frac{1}{\varepsilon} \mathbb{E}_{X \sim \mu} [\sigma^2(X, \mathbf{g}_s)] \end{aligned}$$

909 defining for all  $x \in \mathbb{R}^d$

$$\begin{aligned} \sigma^2(x, \mathbf{g}_s) &= \sum_{i=1}^M \chi_i^\varepsilon(x, \mathbf{g}_s)(g_i - g_{\varepsilon,i}^*)^2 - (m(x, \mathbf{g}_s))^2 \\ &= \sum_{i=1}^M \chi_i^\varepsilon(x, \mathbf{g}_s) (g_i - g_{\varepsilon,i}^* - m(x, \mathbf{g}_s))^2 . \end{aligned}$$

910 A derivation of  $\sigma^2$  leads to (see [5] eq. (A.19),) for more details)

$$\begin{aligned} -\varepsilon \frac{d}{ds} \sigma^2(x, \mathbf{g}_s) &= \sum_{i=1}^M \chi_i(x, \mathbf{g}_s)(g_i - g_{\varepsilon,i}^*)^3 - 3m(x, \mathbf{g}_s)\sigma^2(x, \mathbf{g}_s) - (m(x, \mathbf{g}_s))^3 \\ &= \sum_{i=1}^M \chi_i^\varepsilon(x, \mathbf{g}_s) (g_i - g_{\varepsilon,i}^* - m(x, \mathbf{g}_s))^3 . \end{aligned}$$

911 Since  $\varepsilon^2 \varphi'''(s) = \mathbb{E}_{X \sim \mu} [\frac{d}{ds} \sigma^2(X, \mathbf{g}_s)]$ , we conclude

$$|\varphi'''(s)| \leq \frac{1}{\varepsilon} \varphi''(s) \max_{1 \leq j \leq M} |g_j - g_j^* - m(x, \mathbf{g}_s)| .$$

912

□



913 **B.8 Other Technical results**

914 **Proposition 4.** *For all  $\mathbf{g} \in \mathcal{C}$  and all  $\alpha' \in (0, \alpha)$ , we have*

$$\|\nabla H_\varepsilon(\mathbf{g}) - \nabla H_0(\mathbf{g})\|_\infty \lesssim \varepsilon^{1+\alpha'}.$$

915 *Proof.* We adopt the decomposition of  $\mathcal{X}$  from Appendix A.3 of [18]. See Figure 1 in [18] for an  
 916 illustration of this decomposition. Fix  $i \in \{1, \dots, M\}$ , let  $\mathcal{X} \subset B(0, R)$  be the support of  $\mu$ , and  
 917 choose parameters

$$\eta = \varepsilon^\beta, \quad \gamma = \frac{1}{2}\eta, \quad \beta \in (0, 1).$$

918 Define, for all  $i \in \llbracket 1, M \rrbracket$ , the function

$$f_i(x) := -c(x, y_i) + g_i = -\frac{1}{2}\|x - y_i\|^2 + g_i,$$

919 and use these to define the following sets:

$$H_{ij} = \mathbb{L}_i(\mathbf{g}) \cap \mathbb{L}_j(\mathbf{g})$$

920

$$\mathcal{X}_{i,\eta,+} = \left\{ x \in \mathbb{L}_i(\mathbf{g}); \forall j \neq i, \frac{f_i(x) - f_j(x)}{\|y_i - y_j\|} \geq \eta \right\},$$

921

$$\mathcal{X}_{i,\eta,-} = \left\{ x \in \mathbb{R}^d; \arg \max_j f_j(x) = k, \frac{f_k(x) - f_i(x)}{\|y_k - y_i\|} \geq \eta \right\},$$

922

$$H_{ij}^\gamma = \{x \in H_{ij} \mid \forall k \notin \{i, j\}, f_i(x) = f_j(x) \geq f_k(x) + \gamma \max(\|y_i - y_k\|, \|y_j - y_k\|)\},$$

923

$$A_{i,\eta,\gamma} = \bigcup_{j \neq i} \{x + t d_{ij}; x \in H_{ij}^\gamma, t \in [-\eta\|y_i - y_j\|, \eta\|y_i - y_j\|]\}, \quad d_{ij} = \frac{y_i - y_j}{\|y_i - y_j\|},$$

924

$$B_{i,\eta,\gamma} = \mathbb{R}^d \setminus (\mathcal{X}_{i,\eta,+} \cup \mathcal{X}_{i,\eta,-} \cup A_{i,\eta,\gamma}).$$

925 We also recall the point-wise definitions of the regularized and non-regularized functions constituting  
 926 the gradients

$$\chi_i^\varepsilon(x) = \frac{\exp(f_i(x)/\varepsilon)}{\sum_{k=1}^M \exp(f_k(x)/\varepsilon)}, \quad \chi_i(x) = \mathbf{1}\{i = \arg \max_k f_k(x)\}.$$

927 and define the constant

$$c_y = \min_{i \neq j} \|y_i - y_j\| > 0.$$

928 **Error decomposition.**

$$\|\nabla H_\varepsilon(\mathbf{g}) - \nabla H_0(\mathbf{g})\|_\infty = \max_i \left| \int_{\mathcal{X}} (\chi_i^\varepsilon - \chi_i) d\mu \right| \leq I_1 + I_2 + I_3 + I_4,$$

929 with

$$I_1 = \int_{\mathcal{X}_{i,\eta,+}} |\chi_i^\varepsilon - \chi_i| d\mu, \quad I_2 = \int_{\mathcal{X}_{i,\eta,-}} |\chi_i^\varepsilon - \chi_i| d\mu, \quad I_3 = \int_{A_{i,\eta,\gamma}} |\chi_i^\varepsilon - \chi_i| d\mu, \quad I_4 = \int_{B_{i,\eta,\gamma}} |\chi_i^\varepsilon - \chi_i| d\mu.$$

930 **1. Interior regions  $\mathcal{X}_{i,\eta,+}$  and  $\mathcal{X}_{i,\eta,-}$ .**

931 For  $x \in \mathcal{X}_{i,\eta,+}$  one has  $f_i - f_j \geq \eta\|y_i - y_j\| \geq \eta c_y$  for every  $j \neq i$ , hence

$$\begin{aligned} |\chi_i(x) - \chi_i^\varepsilon(x)| &= 1 - \chi_i^\varepsilon(x) \\ &= 1 - \frac{e^{f_i/\varepsilon}}{\sum_{k=1}^M e^{f_k/\varepsilon}} \\ &= \frac{\sum_{k \neq i} e^{f_k/\varepsilon}}{\sum_{k=1}^M e^{f_k/\varepsilon}} \\ &\leq \mathcal{O}\left(e^{-\eta c_y/\varepsilon}\right) \end{aligned}$$

932 In a same way, we obtain the same bound if  $x \in \mathcal{X}_{i,\eta,-}$ , therefore

$$I_1 + I_2 = \mathcal{O}\left(e^{-\eta c_y/\varepsilon}\right).$$

933 **2. Simple slabs  $A_{i,\eta,\gamma}$ .**

934 Inside one slab  $T_{ij} = \{x + t d_{ij} \mid x \in H_{ij}^\gamma, t \in [-\eta\|y_i - y_j\|, \eta\|y_i - y_j\|]\}$ , and we have  $f_i(x) -$   
 935  $f_j(x) = t\|y_i - y_j\|$ . for a certain  $t \in [-\eta\|y_i - y_j\|, \eta\|y_i - y_j\|]$ . All other indices satisfy  
 936  $f_k(x) - f_i(x) \leq -c_y\gamma$ , so

$$\sum_{k \notin \{i,j\}} e^{(f_k - f_i)/\varepsilon} \leq (M-2)e^{-c_y\gamma/\varepsilon}.$$

937 Hence

$$\chi_i^\varepsilon(x) = \frac{1}{1 + e^{-t\|y_i - y_j\|/\varepsilon} + \sum_{k \notin \{i,j\}} e^{(f_k(x) - f_i(x))/\varepsilon}} = p_\varepsilon(t) + \mathcal{O}\left(e^{-\gamma c_y/\varepsilon}\right),$$

938 with  $p_\varepsilon(t) = (1 + e^{-t/\tilde{\varepsilon}})^{-1}$ ,  $\tilde{\varepsilon} = \varepsilon/\|y_i - y_j\|$ .

939 Introduce coordinates  $x = z + t n_{ij}$  with  $n_{ij} = \frac{y_i - y_j}{\|y_i - y_j\|}$  and  $z \in H_{ij}$ ; the Jacobian of this change  
 940 of coordinate is 1. Since  $f_\mu$  is  $\alpha$ -Hölder, there exists  $L > 0$  such that we can write  $f_\mu(z + t n_{ij}) =$   
 941  $f_\mu(z) + r_\alpha(z, t)$  with  $|r_\alpha(z, t)| \leq L|t|^\alpha$ . Note that the function  $p_\varepsilon(t) - \mathbf{1}_{t>0}$  is odd. Writing  $\sigma$  the  
 942 Hausdorff measure of dimension  $d-1$ , we obtain

$$\begin{aligned} \left| \int_{T_{ij}^{\eta,\gamma}} (\chi_i^\varepsilon - \chi_i) d\mu \right| &= \left| \int_{H_{ij}^\gamma \cap B(0,R)} \int_{-\eta\|y_i - y_j\|}^{\eta\|y_i - y_j\|} [p_\varepsilon(t) - \mathbf{1}_{t>0} + \mathcal{O}(e^{-\gamma/\varepsilon})] (f_\mu(z) + r_\alpha(z, t)) dt d\sigma(z) \right| \\ &= \left| \int_{H_{ij}^\gamma \cap B(0,R)} \int_{-\eta\|y_i - y_j\|}^{\eta\|y_i - y_j\|} [p_\varepsilon(t) - \mathbf{1}_{t>0}] r_\alpha(z, t) dt d\sigma(z) \right. \\ &\quad + \int_{H_{ij}^\gamma \cap B(0,R)} \int_{-\eta\|y_i - y_j\|}^{\eta\|y_i - y_j\|} [p_\varepsilon(t) - \mathbf{1}_{t>0}] f_\mu(z) dt d\sigma(z) \\ &\quad \left. + \int_{H_{ij}^\gamma \cap B(0,R)} \int_{-\eta\|y_i - y_j\|}^{\eta\|y_i - y_j\|} \mathcal{O}(e^{-\gamma/\varepsilon}) (f_\mu(z) + r_\alpha(z, t)) dt d\sigma(z) \right| \\ &\lesssim \text{vol}_{d-1}(H_{ij}^\gamma \cap B(0,R)) \int_{-\eta\|y_i - y_j\|}^{\eta\|y_i - y_j\|} |t|^\alpha dt + \mathcal{O}\left(\eta e^{-\gamma c_y/\varepsilon}\right) \\ &= \mathcal{O}(\eta^{1+\alpha}) + \mathcal{O}\left(\eta e^{-\gamma c_y/\varepsilon}\right). \end{aligned}$$

943 Summing over  $j \neq i$  yields

$$I_3 = \mathcal{O}(\eta^{1+\alpha}) + \mathcal{O}(\eta e^{-\gamma c_y/\varepsilon}).$$

944 **3. Corner set  $B_{i,\eta,\gamma}$ .**

945 As shown in [18], denoting by  $\theta$  the maximum angle that can be formed by three non-aligned points  
 946 of the target measure, each corner that constitutes  $B_{i,\eta,\gamma}$  is included in a cylinder of volume at  
 947 most  $\frac{4\pi \text{diam}(B(0,R))^{d-2}}{\cos(\theta/2)^2} \gamma^2$ . Moreover, there are at most  $M^2$  such corners. Therefore,  $\mu(B_{i,\eta,\gamma}) =$   
 948  $\mathcal{O}(\gamma^2) = \mathcal{O}(\eta^2)$ , and so

$$I_4 = \mathcal{O}(\eta^2).$$

949 **4. Choice of the exponent  $\beta$ .**

950 Let  $\alpha' \in (0, \alpha)$  and pick

$$\beta \in \left(\frac{1+\alpha'}{1+\alpha}, 1\right).$$

951 Then  $\eta^{1+\alpha} = \varepsilon^{\beta(1+\alpha)} \leq \varepsilon^{1+\alpha'}$  and  $\eta^2 = \varepsilon^{2\beta} \leq \varepsilon^{1+\alpha'}$ . Exponential terms are even smaller, hence

$$\|\nabla H_\varepsilon(\mathbf{g}) - \nabla H_0(\mathbf{g})\|_\infty = \mathcal{O}\left(\varepsilon^{1+\alpha'}\right).$$

952

□

953 **Proposition 5.** Let  $(\gamma_t)_{t \geq 0}$  and  $(\nu_t)_{t \geq 0}$  be some positive and decreasing sequences and let  $(\delta_t)_{t \geq 0}$ ,  
954 satisfying the following:

955 • The sequence  $\delta_t$  follows the recursive relation:

$$\delta_{t+1} \leq (1 - 2\omega\gamma_{t+1} + \eta\gamma_{t+1}^2) \delta_t + \nu_{t+1}\gamma_{t+1}, \quad (25)$$

956

with  $\delta_0 \geq 0$  and  $\omega, \eta > 0$ .

957

• Let  $\gamma_t$  converge to 0.

958

• Let  $t_0 = \inf \{t \geq 1 : \omega\gamma_{t+1} \leq 1; \eta\gamma_t \leq \omega\}$ .

959 Then, for all  $t \geq t_0$ , we have the upper bound:

$$\delta_t \leq \exp\left(-\omega \sum_{i=t_0+1}^t \gamma_i\right) \left(\sum_{k=t_0}^t \gamma_k \nu_k + \delta_{t_0}\right) + \frac{1}{\omega} \nu_{\lceil \frac{t}{2} \rceil - 1} \leq \frac{1}{\omega} \nu_{\lceil \frac{t}{2} \rceil - 1} + o(\nu_t).$$

960 *Proof.* For all  $t \geq t_0$ , since  $1 - 2\omega\gamma_{t+1} + \eta\gamma_{t+1}^2 \leq 1 - \omega\gamma_{t+1}$ , one has

$$\begin{aligned} \delta_t &\leq (1 - \omega\gamma_{t+1} + \eta\gamma_{t+1}^2) \delta_t + \nu_{t+1}\gamma_{t+1} \\ &\leq \underbrace{\prod_{i=t_0+1}^t (1 - \omega\gamma_i) \delta_{t_0}}_{=: U_{1,t}} + \underbrace{\sum_{k=t_0+1}^t \prod_{i=k+1}^t (1 - \omega\gamma_i) \gamma_k \nu_k}_{=: U_{2,t}} \end{aligned}$$

961 One can consider two cases:  $\lceil t/2 \rceil - 1 \leq t_0$  and  $\lceil t/2 \rceil - 1 > t_0$ .

962 **Case where  $\lceil t/2 \rceil - 1 \leq t_0 < t$ :** Since  $\nu_k$  is decreasing,

$$\begin{aligned} U_{2,t} &\leq \nu_{t_0+1} \sum_{k=t_0+1}^t \prod_{i=k+1}^t (1 - \omega\gamma_i) \gamma_k \\ &= \frac{1}{\omega} \nu_{t_0+1} \sum_{k=t_0+1}^t \prod_{i=k+1}^t (1 - \omega\gamma_i) - \prod_{i=k}^t (1 - \omega\gamma_i) \\ &= \frac{1}{\omega} \nu_{t_0+1} \left(1 - \prod_{i=t_0+1}^t (1 - \omega\gamma_i)\right) \\ &\leq \frac{1}{\omega} \nu_{t_0+1} \end{aligned}$$

963 Since  $\nu_k$  is decreasing, it comes  $U_{2,t} \leq \frac{1}{\omega} \nu_{\lceil t/2 \rceil}$ .

964 **Case where  $\lceil t/2 \rceil - 1 > t_0$ :** As in [3], for all  $m = t_0 + 1, \dots, t$ , one has

$$U_{2,t} \leq \exp\left(-\omega \sum_{k=m+1}^t \gamma_k\right) \sum_{k=t_0+1}^m \gamma_k \nu_k + \frac{1}{\omega} \nu_m$$

965 Then, taking  $m = \lceil t/2 \rceil - 1$ , it comes

$$U_{2,t} \leq \exp\left(-\omega \sum_{k=\lceil t/2 \rceil}^t \gamma_k\right) \sum_{k=t_0+1}^{\lceil t/2 \rceil - 1} \gamma_k \nu_k + \frac{1}{\omega} \nu_{\lceil t/2 \rceil - 1}$$

966

□

967 **Corollary 2.** Let  $(\gamma_t)_{t \geq 0}$  and  $(\nu_t)_{t \geq 0}$  be some positive and decreasing sequences and let  $(\delta_t)_{t \geq 0}$  be  
 968 a sequence satisfying the following:

969 • The sequence  $\delta_t$  follows the recursive relation:

$$\delta_{t+1} \leq (1 - 2\omega\gamma_{t+1} + \eta\gamma_{t+1}^2) \delta_t + \nu_{t+1}\gamma_{t+1}, \quad (26)$$

970 with  $\delta_0 \geq 0$  and  $\omega, \eta > 0$ .

971 • Let  $\gamma_t = c_\gamma t^{-\alpha}$  with  $\alpha \in (0, 1)$ .

972 • Let  $t_0 = \inf \{t \geq 1 : \omega\gamma_{t+1} \leq 1; \eta\gamma_t \leq \omega\}$ .

973 Then, for all  $t \in \mathbb{N}$ , we have the upper bound:

$$\delta_t \leq \frac{1}{\omega} \nu_{\frac{t}{2}-1} + o(\nu_t).$$

974 *Proof.* Applying Proposition 5, for all  $t \geq t_0$ , we have the upper bound:

$$\delta_t \leq \exp \left( -\omega \sum_{i=t_0+1}^t \gamma_i \right) \left( \sum_{k=t_0}^t \gamma_k \nu_k + \delta_{t_0} \right) + \frac{1}{\omega} \nu_{\lceil \frac{t}{2} \rceil - 1}.$$

975 Approximating the sum  $\sum_{s=t_0}^t \gamma_s$  via a Riemann sum lower bound for the function  $x \mapsto \frac{1}{x^\alpha}$ , and  
 976 applying the logarithmic inequality  $\log(1-x) \leq -x$ , one can now bound  $\prod_{i=t_0+1}^t (1 - \omega\gamma_i) \delta_{t_0}$  as

$$\begin{aligned} \prod_{i=t_0+1}^t (1 - \omega\gamma_i) \delta_{t_0} &\leq \exp \left( -\omega \frac{c_\gamma}{1-\alpha} \left( (t+1)^{1-\alpha} - (t_0+1)^{1-\alpha} \right) \right) \gamma_{t_0} \nu_{t_0} \\ &\leq \exp \left( -\frac{\omega c_\gamma}{2} \left( (t+1)^{1-\alpha} - (t_0+1)^{1-\alpha} \right) \right) \gamma_{t_0} \nu_{t_0}. \end{aligned}$$

977 In a same way, since

$$\exp \left( -\omega \sum_{k=\lceil t/2 \rceil}^t \gamma_k \right) \leq \exp \left( -\frac{\omega c_\gamma}{2} (t+1)^{1-\alpha} \right),$$

978 we obtain

$$\delta_t \leq \exp \left( -\frac{1}{2} \omega c_\gamma t^{1-\alpha} \right) \exp \left( \frac{1}{2} \omega c_\gamma (t_0+1)^{1-\alpha} \right) \left( \sum_{k=t_0}^t \gamma_k \nu_k + \delta_{t_0} \right) + \frac{1}{\omega} \nu_{\frac{t}{2}-1}.$$

979 Since the product involving exponential terms converges exponentially fast, we finally obtain the  
 980 desired convergence rate

$$\delta_t \leq \frac{1}{\omega} \nu_{\frac{t}{2}-1} + o(\nu_t).$$

981

□

982
